# Supplementary material for: Novel group 13 Lewis superacids and 13–15 donor–acceptor cryptands for hydrogen activation: a theoretical study
Source: Royal Society of Chemistry journal article supplement (doi:10.1039/c2cp41795b), 2012-01-01
Supplement: c2cp41795b.pdf [file c2cp41795b.pdf]

**Supplementary information for the manuscript “Novel group 13 Lewis superacids and 13-15 donor-acceptor cryptands for hydrogen activation: a theoretical study” by Alexey Y. Timoshkin\* and Keiji Morokuma.**

**Total energies  $E^{\circ}_0$ , standard enthalpies  $H^{\circ}_{298}$  in Hartree, and standard entropies  $S^{\circ}_{298}$  in cal  $\text{mol}^{-1} \text{K}^{-1}$ .**

| Compound                                                                             | B3LYP/pVDZ    |                   |                   | B3LYP/def2-TZVPP |                   |                   |
|--------------------------------------------------------------------------------------|---------------|-------------------|-------------------|------------------|-------------------|-------------------|
|                                                                                      | $E^{\circ}_0$ | $H^{\circ}_{298}$ | $S^{\circ}_{298}$ | $E^{\circ}_0$    | $H^{\circ}_{298}$ | $S^{\circ}_{298}$ |
| H <sub>2</sub>                                                                       | -1.1737901    | -1.16053          | 31.227            | -1.1800044       | -1.166631         | 31.133            |
| NH <sub>3</sub>                                                                      | -56.5094755   | -56.471622        | 46.015            | -56.588622       | -56.55057         | 45.967            |
| PH <sub>3</sub>                                                                      | -343.054335   | -343.026707       | 50.248            | -343.1774589     | -343.149724       | 50.196            |
| AsH <sub>3</sub>                                                                     | -2237.43019   | -2237.404478      | 53.27             | -2237.711253     | -2237.685676      | 53.256            |
| [NH <sub>4</sub> ] <sup>+</sup>                                                      | -56.8557557   | -56.803122        | 44.465            | -56.9271387      | -56.8739          | 44.406            |
| [PH <sub>4</sub> ] <sup>+</sup>                                                      | -343.361699   | -343.322808       | 48.65             | -343.4854956     | -343.446445       | 48.586            |
| [AsH <sub>4</sub> ] <sup>+</sup>                                                     | -2237.72474   | -2237.688749      | 51.68             | -2238.006091     | -2237.970007      | 51.633            |
| N(C <sub>6</sub> H <sub>5</sub> ) <sub>3</sub>                                       | -749.167189   | -748.872813       | 124.411           | -749.9762728     | -749.682466       | 124.676           |
| P(C <sub>6</sub> H <sub>5</sub> ) <sub>3</sub>                                       | -1035.71527   | -1035.424792      | 132.755           | -1036.588097     | -1036.297894      | 132.527           |
| As(C <sub>6</sub> H <sub>5</sub> ) <sub>3</sub>                                      | -2930.0866    | -2929.797105      | 135.611           | -2931.117891     | -2930.828649      | 134.355           |
| [HN(C <sub>6</sub> H <sub>5</sub> ) <sub>3</sub> ] <sup>+</sup>                      | -749.525111   | -749.216817       | 124.046           | -750.3365444     | -750.028263       | 123.562           |
| [HP(C <sub>6</sub> H <sub>5</sub> ) <sub>3</sub> ] <sup>+</sup>                      | -1036.0996    | -1035.797986      | 132.024           | -1036.976521     | -1036.674789      | 131.895           |
| [HAs(C <sub>6</sub> H <sub>5</sub> ) <sub>3</sub> ] <sup>+</sup>                     | -2930.44995   | -2930.150471      | 136.52            | -2931.48168      | -2931.182302      | 137.236           |
| N(2,6-Me <sub>2</sub> C <sub>6</sub> H <sub>3</sub> ) <sub>3</sub>                   | -984.874579   | -984.405537       | 154.69            | -985.9400937     | -985.470944       | 156.513           |
| P(2,6-Me <sub>2</sub> C <sub>6</sub> H <sub>3</sub> ) <sub>3</sub>                   | -1271.41229   | -1270.947573      | 166.56            | -1272.541875     | -                 | -                 |
| As(2,6-Me <sub>2</sub> C <sub>6</sub> H <sub>3</sub> ) <sub>3</sub>                  | -3165.78225   | -3165.318675      | 170.542           | -3167.071487     | -3166.607632      | 172.853           |
| [HN(2,6-Me <sub>2</sub> C <sub>6</sub> H <sub>3</sub> ) <sub>3</sub> ] <sup>+</sup>  | -985.229676   | -984.746334       | 158.537           | -986.2976872     | -                 | -                 |
| [HP(2,6-Me <sub>2</sub> C <sub>6</sub> H <sub>3</sub> ) <sub>3</sub> ] <sup>+</sup>  | -1271.81151   | -1271.33537       | 166.412           | -1272.94524      | -1272.46821       | 166.559           |
| [HAs(2,6-Me <sub>2</sub> C <sub>6</sub> H <sub>3</sub> ) <sub>3</sub> ] <sup>+</sup> | -3166.16575   | -3165.691633      | 172.678           | -3167.455251     | -                 | -                 |
| B(C <sub>6</sub> F <sub>5</sub> ) <sub>3</sub>                                       | -2206.60731   | -2206.422813      | 189.105           | -2209.206699     | -2209.023184      | 188.322           |
| Al(C <sub>6</sub> F <sub>5</sub> ) <sub>3</sub>                                      | -2424.15991   | -2423.979093      | 208.47            | -2426.824697     | -2426.644701      | 210.461           |
| Ga(C <sub>6</sub> F <sub>5</sub> ) <sub>3</sub>                                      | -4106.42556   | -4106.245239      | 202.995           | -4109.250885     | -4109.071232      | 206.141           |
| [HB(C <sub>6</sub> F <sub>5</sub> ) <sub>3</sub> ] <sup>-</sup>                      | -2207.30921   | -2207.116224      | 198.905           | -2209.919122     | -2209.727294      | 197.895           |
| [HAl(C <sub>6</sub> F <sub>5</sub> ) <sub>3</sub> ] <sup>-</sup>                     | -2424.86167   | -2424.674964      | 204.499           | -2427.533904     | -2427.348135      | 206.033           |
| [HGa(C <sub>6</sub> F <sub>5</sub> ) <sub>3</sub> ] <sup>-</sup>                     | -4107.12404   | -4106.937472      | 207.819           | -4109.957993     | -4109.772443      | 207.889           |
| B(C <sub>6</sub> H <sub>2</sub> F <sub>2</sub> ) <sub>3</sub> CF                     | -1450.22216   | -1449.996293      | 144.316           | -1451.878291     | -1451.653659      | 144.56            |
| Al(C <sub>6</sub> H <sub>2</sub> F <sub>2</sub> ) <sub>3</sub> CF                    | -1667.74681   | -1667.52467       | 149.265           | -1669.464772     | -1669.243891      | 149.834           |
| Ga(C <sub>6</sub> H <sub>2</sub> F <sub>2</sub> ) <sub>3</sub> CF                    | -3350.01266   | -3349.790968      | 151.234           | -3351.891657     | -3351.671238      | 151.825           |
| [HB(C <sub>6</sub> H <sub>2</sub> F <sub>2</sub> ) <sub>3</sub> CF] <sup>-</sup>     | -1450.95442   | -1450.720024      | 142.3             | -1452.618517     | -1452.38558       | 142.777           |
| [HAl(C <sub>6</sub> H <sub>2</sub> F <sub>2</sub> ) <sub>3</sub> CF] <sup>-</sup>    | -1668.47627   | -1668.248016      | 148.504           | -1670.199598     | -1669.972805      | 149.054           |
| [HGa(C <sub>6</sub> H <sub>2</sub> F <sub>2</sub> ) <sub>3</sub> CF] <sup>-</sup>    | -3350.74089   | -3350.512872      | 150.705           | -3352.626234     | -3352.39968       | 151.258           |

**Figure S1.** Rigid PES scan for  $\text{Al}(\text{C}_6\text{H}_2\text{F}_2)_3\text{CF}-\text{H}_2-\text{NH}_3$  system as a function of H-H distance. Energy values are given with respect to the structure shown in Figure 4,b. For all points Al-N distance is fixed at 4.3 Å.

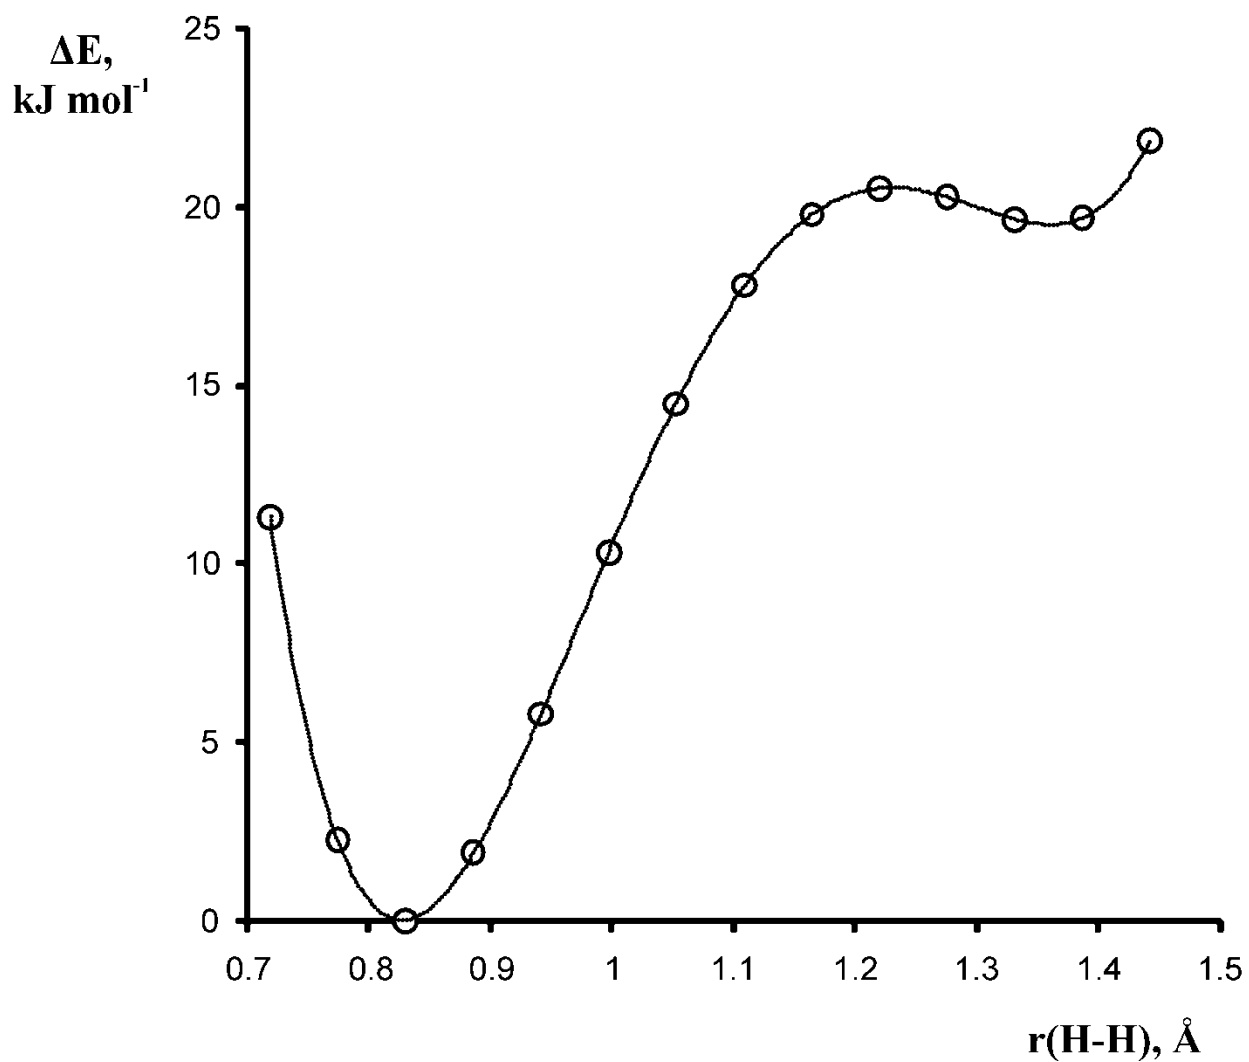

**Optimized geometries (xyz coordinates in angstroms B3LYP/def2-TZVPP level of theory).**

**B(C<sub>6</sub>F<sub>5</sub>)<sub>3</sub>**

B 0.0000816811 0.0009280218 0.3058384656  
C 1.3058749086 0.7897752728 0.6656637867  
C -0.0253780835 -1.5626859284 0.4122030047  
C -1.2802517817 0.7756947209 -0.1603513947  
C -0.0712884676 -4.3822766873 0.6040051254  
C 1.0518374244 -2.3556892991 0.0062504845  
C -1.1268289211 -2.258097718 0.9194046808  
C -1.1625607502 -3.6378261897 1.0318568237  
C 1.0425900115 -3.7383653974 0.0817103828  
F 2.1466886876 -1.7863041784 -0.516452659  
F -2.2014982771 -1.5880090193 1.3577928555  
F -2.2269144345 -4.2555612352 1.5427190675  
F 2.085237121 -4.4537417868 -0.3384672113  
F -0.092843037 -5.7060526881 0.6940547341  
C 3.6605498056 2.2122660473 1.3145196953  
C 2.1092402163 0.4447849618 1.7563658141  
C 1.7455033945 1.8856748522 -0.0825179767  
C 2.902330691 2.5869961277 0.2132386436  
C 3.2593309278 1.1371038818 2.0963051797  
F 1.7616398026 -0.5767831964 2.5511549253  
F 1.0580039878 2.2819252872 -1.162539939  
F 3.293420024 3.612142847 -0.5427699023  
F 3.9815393387 0.784515303 3.1590948528  
F 4.7660514137 2.8801144373 1.6191525137  
C -3.5890162946 2.1727947052 -1.001009424  
C -2.0967775994 0.3124310171 -1.1960720977  
C -1.6824844279 1.9764643165 0.4315998885  
C -2.8166257581 2.6684038971 0.0410669656  
C -3.2245750353 0.989255811 -1.6291472019  
F -1.7842183708 -0.8180586596 -1.8444678873  
F -0.9801257433 2.4927978969 1.4495434981  
F -3.1726204791 3.7985962296 0.6504589858  
F -3.9601714833 0.519616773 -2.636004999  
F -4.6729633334 2.828722316 -1.395691851

**Al(C<sub>6</sub>F<sub>5</sub>)<sub>3</sub>**

13 0.00208 0.00607 0.00125  
6 1.94852 -0.21317 -0.00347  
6 -1.1572 -1.57293 0.00371  
6 -0.7873 1.79862 0.00233  
6 -2.81812 -3.84018 0.00223  
6 -1.03862 -2.5671 -0.95569

|   |          |          |          |
|---|----------|----------|----------|
| 6 | -2.14137 | -1.76018 | 0.96245  |
| 6 | -2.97195 | -2.86928 | 0.98529  |
| 6 | -1.84546 | -3.69341 | -0.9801  |
| 9 | -0.10806 | -2.43757 | -1.92331 |
| 9 | -2.29959 | -0.83468 | 1.93053  |
| 9 | -3.90367 | -3.02013 | 1.92649  |
| 9 | -1.70776 | -4.6264  | -1.922   |
| 9 | -3.60337 | -4.91205 | 0.00159  |
| 6 | 4.74034  | -0.53938 | -0.00892 |
| 6 | 2.59438  | -1.0149  | 0.92574  |
| 6 | 2.75806  | 0.41887  | -0.93538 |
| 6 | 4.13584  | 0.27343  | -0.96092 |
| 6 | 3.96859  | -1.19132 | 0.94599  |
| 9 | 1.86481  | -1.64677 | 1.86742  |
| 9 | 2.19098  | 1.20245  | -1.87463 |
| 9 | 4.88253  | 0.89079  | -1.87635 |
| 9 | 4.55633  | -1.96477 | 1.85868  |
| 9 | 6.06001  | -0.69369 | -0.01172 |
| 6 | -1.92519 | 4.36916  | 0.00466  |
| 6 | -1.7739  | 2.16431  | -0.90161 |
| 6 | -0.39415 | 2.77336  | 0.90749  |
| 6 | -0.93994 | 4.04673  | 0.9308   |
| 6 | -2.34962 | 3.4245   | -0.92266 |
| 9 | -2.19187 | 1.2672   | -1.81709 |
| 9 | 0.55125  | 2.47823  | 1.82209  |
| 9 | -0.5424  | 4.95657  | 1.82009  |
| 9 | -3.29109 | 3.74327  | -1.81079 |
| 9 | -2.46306 | 5.58404  | 0.00589  |

**Ga(C<sub>6</sub>F<sub>5</sub>)<sub>3</sub>**

|    |          |          |          |
|----|----------|----------|----------|
| 31 | 0.00299  | 0.00072  | -0.00199 |
| 6  | 1.96133  | -0.26151 | 0.00076  |
| 6  | -1.20371 | -1.56425 | -0.0005  |
| 6  | -0.75266 | 1.82655  | -0.00377 |
| 6  | -2.92108 | -3.78703 | 0.00154  |
| 6  | -0.89912 | -2.72234 | -0.70143 |
| 6  | -2.40077 | -1.56097 | 0.70128  |
| 6  | -3.26236 | -2.6465  | 0.71812  |
| 6  | -1.73204 | -3.83007 | -0.71617 |
| 9  | 0.23879  | -2.78971 | -1.41552 |
| 9  | -2.75322 | -0.47545 | 1.41317  |
| 9  | -4.40202 | -2.61381 | 1.40906  |
| 9  | -1.41343 | -4.92535 | -1.40618 |
| 9  | -3.73334 | -4.8386  | 0.00258  |
| 6  | 4.7455   | -0.63578 | 0.00406  |
| 6  | 2.55607  | -1.31052 | 0.68758  |

|   |          |          |          |
|---|----------|----------|----------|
| 6 | 2.81358  | 0.5931   | -0.68419 |
| 6 | 4.18947  | 0.42669  | -0.69789 |
| 6 | 3.92706  | -1.51335 | 0.70457  |
| 9 | 1.7915   | -2.16972 | 1.38476  |
| 9 | 2.30471  | 1.62372  | -1.38246 |
| 9 | 4.98003  | 1.26175  | -1.37232 |
| 9 | 4.46744  | -2.52717 | 1.38084  |
| 9 | 6.06232  | -0.81277 | 0.0056   |
| 6 | -1.8292  | 4.42132  | -0.0022  |
| 6 | -1.9208  | 2.13267  | -0.68769 |
| 6 | -0.14417 | 2.86896  | 0.681    |
| 6 | -0.65817 | 4.15602  | 0.69713  |
| 6 | -2.46882 | 3.40565  | -0.70219 |
| 9 | -2.55701 | 1.17392  | -1.38407 |
| 9 | 0.98365  | 2.64102  | 1.37732  |
| 9 | -0.05267 | 5.13373  | 1.37139  |
| 9 | -3.58898 | 3.66823  | -1.37565 |
| 9 | -2.33814 | 5.64867  | -0.00166 |

**[HB(C<sub>6</sub>F<sub>5</sub>)<sub>3</sub>]<sup>-</sup>**

|   |               |               |               |
|---|---------------|---------------|---------------|
| B | -0.0034076261 | -0.0039333652 | 0.7690969509  |
| C | -1.4498090083 | -0.65188522   | 0.3327394824  |
| C | 1.2830184896  | -0.9286054936 | 0.3311191764  |
| C | 0.158846105   | 1.572885055   | 0.3325586962  |
| C | 3.5447550593  | -2.5616641124 | -0.2377569559 |
| C | 1.6201827853  | -2.0463922008 | 1.0908049627  |
| C | 2.1380923857  | -0.6880758999 | -0.7387474108 |
| C | 3.2502804314  | -1.4666183983 | -1.0313507067 |
| C | 2.7184295709  | -2.8551860826 | 0.8340321283  |
| F | 0.8599284303  | -2.4066139102 | 2.1442363494  |
| F | 1.9103887141  | 0.340805319   | -1.5819809313 |
| F | 4.0400132895  | -1.1787772006 | -2.0816529436 |
| F | 2.9928216992  | -3.9199196004 | 1.6096931319  |
| F | 4.6136331556  | -3.3303966501 | -0.5051312155 |
| C | -4.0042320888 | -1.7786646635 | -0.2246859717 |
| C | -1.6714001423 | -1.5380574176 | -0.7156952045 |
| C | -2.5885739574 | -0.3530413466 | 1.0776834451  |
| C | -3.8427933222 | -0.8902274048 | 0.8253554676  |
| C | -2.906976424  | -2.1039252331 | -1.0027990511 |
| F | -0.6647094656 | -1.8901330102 | -1.5426226979 |
| F | -2.5160023189 | 0.511083795   | 2.1098672033  |
| F | -4.9039835982 | -0.5633943379 | 1.5853886647  |
| F | -3.0549041711 | -2.9574671406 | -2.0320328382 |
| F | -5.2090205057 | -2.3123781126 | -0.4868472763 |
| C | 0.4654391297  | 4.3461037396  | -0.2346355149 |
| C | 0.9833800834  | 2.4120584741  | 1.0785375989  |

C -0.4917859428 2.2042983699 -0.7217766464  
C -0.3620423813 3.5559800261 -1.0134144926  
C 1.1476948102 3.7658738374 0.821552957  
F 1.6882330505 1.9221857446 2.1181304331  
F -1.2941607369 1.5052994582 -1.5518714056  
F -1.0206642796 4.1069981989 -2.0489301484  
F 1.9577886682 4.5236545726 1.5831767229  
F 0.6079446838 5.6551037198 -0.5016269002  
H -0.0037549073 -0.0039269571 1.9732181501

**[HAl(C<sub>6</sub>F<sub>5</sub>)<sub>3</sub>]**

Al -0.0163448307 -0.045416661 -0.7770628637  
C 1.6737450807 0.9419759846 -0.1756332801  
C -0.014372284 -1.9471793659 -0.0178788202  
C -1.6756808768 0.9598888563 -0.1220587477  
C 0.0660646135 -4.648363562 0.8383390522  
C 0.8704144919 -2.8752740372 -0.5449823748  
C -0.8518913066 -2.4425953991 0.9675405879  
C -0.8348781352 -3.7612043505 1.4043270169  
C 0.9321429514 -4.2028653622 -0.1480674343  
F 1.7515035075 -2.4959170958 -1.4988868851  
F -1.7504356419 -1.6344796542 1.5754155971  
F -1.6716382465 -4.1924046809 2.3650067114  
F 1.8118559144 -5.0613724886 -0.6937452821  
F 0.1024910723 -5.9273181661 1.2436283986  
C 4.0214269384 2.3997930988 0.4561375305  
C 2.5825833181 0.5154695918 0.7783226539  
C 2.0001357176 2.141348971 -0.7896520962  
C 3.1413835853 2.8757895903 -0.5032941382  
C 3.7409358617 1.208849273 1.1058060911  
F 2.3718349255 -0.6318761205 1.4632518019  
F 1.1717929085 2.66495376 -1.7223093605  
F 3.4090137684 4.0351929828 -1.1300728515  
F 4.5923500833 0.7497650461 2.0403338758  
F 5.1338271506 3.0885965461 0.7551806702  
C -4.068048434 2.3025962376 0.5918667107  
C -2.9138109238 0.6137184284 -0.6409474992  
C -1.7008581887 2.0100237819 0.7804429476  
C -2.8578747871 2.6862389445 1.1462940702  
C -4.1003602013 1.2525142625 -0.3124793986  
F -3.0113875677 -0.4138116892 -1.5154896727  
F -0.5609614427 2.4342918038 1.3725384301  
F -2.8274478916 3.7017881323 2.02762303  
F -5.2754100793 0.8746305054 -0.8464787875  
F -5.1999544086 2.9397641978 0.9296789004  
H -0.0421465924 -0.1171108945 -2.3661918212

**[HGa(C<sub>6</sub>F<sub>5</sub>)<sub>3</sub>]**

Ga -0.0830850879 0.1202030404 -0.8994032973  
C 1.6248342411 1.0259678167 -0.1803254843  
C 0.0348235852 -1.8486114469 -0.2739471588  
C -1.7605594647 1.0162981525 -0.091915543  
C 0.2757141947 -4.5775368347 0.4377690941  
C 0.8657583882 -2.7246778701 -0.9520443054  
C -0.6641806498 -2.403656023 0.7844703159  
C -0.5654241765 -3.7394677189 1.1520047416  
C 1.0023290339 -4.0671959631 -0.62606069  
F 1.6092311735 -2.2855730837 -1.9929624239  
F -1.4949252269 -1.6463851723 1.5318374829  
F -1.2661881468 -4.234754882 2.1875161957  
F 1.8237020326 -4.8783508852 -1.3171144916  
F 0.3887016868 -5.8719341092 0.7756267276  
C 3.9929737848 2.2119115079 0.8106819619  
C 2.029946134 0.8882526839 1.1362105227  
C 2.4596303202 1.7898599606 -0.9778639095  
C 3.6279094731 2.3823558862 -0.5148385085  
C 3.1868632208 1.4574988391 1.6489514562  
F 1.2783346434 0.1758646722 2.004617213  
F 2.160697708 2.0055835882 -2.2769515449  
F 4.409341431 3.1185232819 -1.3257940983  
F 3.539299524 1.2967381509 2.9366931902  
F 5.1173597006 2.7749694738 1.2805720018  
C -4.1637923993 2.1769132937 0.8507044472  
C -3.0041487873 0.4584369778 -0.33674273  
C -1.7791767927 2.1892501282 0.6417738525  
C -2.9446918393 2.7779730852 1.1172541516  
C -4.1975015159 1.0031101582 0.1137102199  
F -3.0995078171 -0.6855317499 -1.051652601  
F -0.6297459067 2.8377588583 0.9349040095  
F -2.9122682301 3.9193191527 1.828434364  
F -5.3806429486 0.4199288244 -0.1484763586  
F -5.3031215021 2.7278508346 1.2986870021  
H -0.1784898373 0.1891075835 -2.4698287804

**B(C<sub>6</sub>H<sub>2</sub>F<sub>2</sub>)<sub>3</sub>CF**

C 0.8831514589 0. 1.503647736  
B 1.2942900052 0. -0.0025858374  
C 0.8831279915 1.3047302299 -0.7549467565  
C 0.8831279915 -1.3047302299 -0.7549467565  
C -0.5912822712 0. 3.8361768146  
C 1.5280627568 0. 2.7279024209  
C -0.5301154922 0. 1.4345120194

C -1.2600413753 0. 2.6107308153  
C 0.7848132301 0. 3.9076194868  
H 2.6079769075 0. 2.7825844066  
C -1.1066126099 0. -0.002450605  
F -2.5956217111 0. 2.6300947916  
H 1.2588394448 0. 4.8790515006  
F -1.3261404101 0. 4.9588791336  
C -0.5910080453 -3.3276115174 -1.9162624451  
C -0.5301938137 -1.2448996209 -0.7203855523  
C 1.5281702274 -2.3662499104 -1.364738494  
C 0.7851241675 -3.3894312573 -1.952001432  
C -1.2599978831 -2.2650384096 -1.3060233048  
H 2.6080925452 -2.4137578207 -1.3915393423  
H 1.2593263989 -4.2319479318 -2.4354167777  
F -2.595631189 -2.2821170755 -1.3152974841  
F -1.3256880993 -4.301426754 -2.4751867961  
C -0.5910080453 3.3276115174 -1.9162624451  
C -0.5301938137 1.2448996209 -0.7203855523  
C 1.5281702274 2.3662499104 -1.364738494  
C 0.7851241675 3.3894312573 -1.952001432  
C -1.2599978831 2.2650384096 -1.3060233048  
H 2.6080925452 2.4137578207 -1.3915393423  
H 1.2593263989 4.2319479318 -2.4354167777  
F -2.595631189 2.2821170755 -1.3152974841  
F -1.3256880993 4.301426754 -2.4751867961  
F -2.4699645258 0. -0.0026616109

### Al(C<sub>6</sub>H<sub>2</sub>F<sub>2</sub>)<sub>3</sub>CF

C -1.7836931471 0. -1.0784622937  
Al -0.0038083814 0. -1.8206977785  
C 0.8870922915 -1.5408442662 -1.0767938402  
C 0.8870922915 1.5408442662 -1.0767938402  
C -3.8792509913 0. 0.7187898471  
C -3.0981899869 0. -1.5243098632  
C -1.4944753188 0. 0.3116395882  
C -2.5699169501 0. 1.2010964208  
C -4.1617086735 0. -0.6285211936  
H -3.3146607232 0. -2.5847045373  
C -0.0035591289 0. 0.8020659696  
F -2.4411301322 0. 2.5316653679  
H -5.1928035078 0. -0.9537305384  
F -4.8782963195 0. 1.6145226334  
C 1.9431025413 3.3517506792 0.7198985692  
C 0.7435025234 1.2906158375 0.3132852515  
C 1.5469631888 2.677611741 -1.5229607135  
C 2.0828758247 3.5966813328 -0.6274861239



|   |               |               |               |
|---|---------------|---------------|---------------|
| C | 1.2854307264  | 2.2196882471  | 1.2024465464  |
| H | 1.6542804287  | 2.8653536325  | -2.5834018778 |
| H | 2.6006959333  | 4.4881863384  | -0.9529947367 |
| F | 1.2227544704  | 2.1072336669  | 2.5330475807  |
| F | 2.4467226695  | 4.2146465817  | 1.6155957634  |
| C | 1.9431025413  | -3.3517506792 | 0.7198985692  |
| C | 0.7435025234  | -1.2906158375 | 0.3132852515  |
| C | 1.5469631888  | -2.677611741  | -1.5229607135 |
| C | 2.0828758247  | -3.5966813328 | -0.6274861239 |
| C | 1.2854307264  | -2.2196882471 | 1.2024465464  |
| H | 1.6542804287  | -2.8653536325 | -2.5834018778 |
| H | 2.6006959333  | -4.4881863384 | -0.9529947367 |
| F | 1.2227544704  | -2.1072336669 | 2.5330475807  |
| F | 2.4467226695  | -4.2146465817 | 1.6155957634  |
| F | -0.0054372931 | 0.            | 2.1693734929  |

### **Ga(C<sub>6</sub>H<sub>2</sub>F<sub>2</sub>)<sub>3</sub>CF**

|    |               |               |               |
|----|---------------|---------------|---------------|
| C  | -1.7954598418 | 0.            | 1.0715934418  |
| Ga | -0.003448283  | 0.            | 1.8643594816  |
| C  | 0.8934664635  | 1.551260172   | 1.0698398368  |
| C  | 0.8934664635  | -1.551260172  | 1.0698398368  |
| C  | -3.8814688752 | 0.            | -0.7206478971 |
| C  | -3.1039172675 | 0.            | 1.5255407431  |
| C  | -1.4952918598 | 0.            | -0.3120649991 |
| C  | -2.5719821218 | 0.            | -1.2017914377 |
| C  | -4.1653425207 | 0.            | 0.6265331292  |
| H  | -3.3169782141 | 0.            | 2.5860256231  |
| C  | -0.0035642707 | 0.            | -0.7977481675 |
| F  | -2.4408266789 | 0.            | -2.5316595064 |
| H  | -5.1967578119 | 0.            | 0.9506780767  |
| F  | -4.880028902  | 0.            | -1.6173506414 |
| C  | 1.9438896051  | -3.3540026978 | -0.7221607992 |
| C  | 0.7439534195  | -1.2914807797 | -0.3137748848 |
| C  | 1.5503032898  | -2.682874202  | 1.5238878897  |
| C  | 2.0847864208  | -3.6001931606 | 0.6250453491  |
| C  | 1.2861250468  | -2.2217321365 | -1.203352894  |
| H  | 1.656210182   | -2.8676732027 | 2.5843876308  |
| H  | 2.6027672172  | -4.4920331598 | 0.949330073   |
| F  | 1.2218684597  | -2.1072955278 | -2.5332391029 |
| F  | 2.4468769096  | -4.216539181  | -1.6189865483 |
| C  | 1.9438896051  | 3.3540026978  | -0.7221607992 |
| C  | 0.7439534195  | 1.2914807797  | -0.3137748848 |
| C  | 1.5503032898  | 2.682874202   | 1.5238878897  |
| C  | 2.0847864208  | 3.6001931606  | 0.6250453491  |
| C  | 1.2861250468  | 2.2217321365  | -1.203352894  |

H 1.656210182 2.8676732027 2.5843876308  
H 2.6027672172 4.4920331598 0.949330073  
F 1.2218684597 2.1072955278 -2.5332391029  
F 2.4468769096 4.2165391809 -1.6189865483  
F -0.0054274021 0. -2.1654210949

**[HB(C<sub>6</sub>H<sub>2</sub>F<sub>2</sub>)<sub>3</sub>CF]<sup>-</sup>**

C -0.7370803504 -1.2766606129 0.8018356994  
C -0.7370803561 1.2766606096 0.8018356994  
C 1.4741606895 0.0000000033 0.8018356994  
C -1.9132073453 -3.3137723348 -0.6846809615  
C -1.3578107681 -2.3517972397 1.428332454  
C -0.7133062825 -1.2354827192 -0.6053353239  
C -1.2995848101 -2.2509469217 -1.3431802972  
C -1.9502359634 -3.3779077829 0.6913717797  
H -1.3821682962 -2.3939857162 2.5104408022  
C -0.0000000056 0. -1.1737090002  
F -1.3125214921 -2.2733539123 -2.69219779  
H -2.4370180848 -4.2210391539 1.1645865886  
F -2.4812030428 -4.2975697464 -1.4291359662  
C 3.8264146885 0.0000000085 -0.6846809615  
C 1.4266125536 0.0000000032 -0.6053353239  
C 2.7156215297 0.0000000061 1.428332454  
C 3.9004719248 0.0000000087 0.6913717797  
C 2.5991696133 0.0000000058 -1.3431802972  
H 2.7643365862 0.0000000062 2.5104408022  
H 4.8740361715 0.0000000109 1.1645865886  
F 2.6250429774 0.0000000059 -2.69219779  
F 4.9624060878 0.0000000111 -1.4291359662  
C -1.9132073601 3.3137723263 -0.6846809615  
C -0.713306288 1.2354827161 -0.6053353239  
C -1.3578107786 2.3517972336 1.428332454  
C -1.9502359784 3.3779077742 0.6913717797  
C -1.2995848201 2.2509469159 -1.3431802972  
H -1.3821683069 2.39398571 2.5104408022  
H -2.4370181037 4.221039143 1.1645865886  
F -1.3125215023 2.2733539064 -2.69219779  
F -2.481203062 4.2975697353 -1.4291359662  
F -0.0000000056 0. -2.5537410965  
B -0.0000000056 0. 1.4939336839  
H -0.0000000056 0. 2.707406661

**[HAl(C<sub>6</sub>H<sub>2</sub>F<sub>2</sub>)<sub>3</sub>CF]<sup>-</sup>**

C -0.8570734127 -1.4844946685 0.9420546944  
C -0.8570733886 1.4844946824 0.9420546944  
C 1.7141468007 -0.0000000139 0.9420546944

C -1.930704693 -3.3440785599 -0.8234990115  
C -1.5153018442 -2.6245797336 1.3988753293  
C -0.7364953013 -1.2756472573 -0.4495405071  
C -1.2806412669 -2.2181356988 -1.3229879209  
C -2.0590779607 -3.5664275777 0.528244551  
H -1.6129103409 -2.7936426059 2.4656597644  
C -0.0000000002 0. -0.943206836  
F -1.2297816822 -2.1300443156 -2.667720284  
H -2.5719789002 -4.4547980476 0.874154933  
F -2.4446593731 -4.2342741619 -1.7088700736  
C 3.8614093313 -0.0000000313 -0.8234990115  
C 1.4729905814 -0.0000000119 -0.4495405071  
C 3.0306036454 -0.0000000245 1.3988753293  
C 4.1181558631 -0.0000000333 0.528244551  
C 2.5612824973 -0.0000000207 -1.3229879209  
H 3.225820636 -0.0000000261 2.4656597644  
H 5.1439577278 -0.0000000416 0.874154933  
F 2.4595633293 -0.0000000199 -2.667720284  
F 4.8893186771 -0.0000000396 -1.7088700736  
C -1.9307046389 3.3440785911 -0.8234990115  
C -0.7364952807 1.2756472692 -0.4495405071  
C -1.5153018017 2.6245797581 1.3988753293  
C -2.059077903 3.566427611 0.528244551  
C -1.280641231 2.2181357195 -1.3229879209  
H -1.6129102957 2.793642632 2.4656597644  
H -2.5719788281 4.4547980892 0.874154933  
F -1.2297816477 2.1300443355 -2.667720284  
F -2.4446593046 4.2342742015 -1.7088700736  
F -0.0000000002 0. -2.326059867  
Al -0.0000000002 0. 1.977918657  
H -0.0000000002 0. 3.5822284532

**[HGa(C<sub>6</sub>H<sub>2</sub>F<sub>2</sub>)<sub>3</sub>CF]<sup>+</sup>**

Ga -0.0830850879 0.1202030404 -0.8994032973  
C 1.6248342411 1.0259678167 -0.1803254843  
C 0.0348235852 -1.8486114469 -0.2739471588  
C -1.7605594647 1.0162981525 -0.091915543  
C 0.2757141947 -4.5775368347 0.4377690941  
C 0.8657583882 -2.7246778701 -0.9520443054  
C -0.6641806498 -2.403656023 0.7844703159  
C -0.5654241765 -3.7394677189 1.1520047416  
C 1.0023290339 -4.0671959631 -0.62606069  
F 1.6092311735 -2.2855730837 -1.9929624239  
F -1.4949252269 -1.6463851723 1.5318374829  
F -1.2661881468 -4.234754882 2.1875161957  
F 1.8237020326 -4.8783508852 -1.3171144916

F 0.3887016868 -5.8719341092 0.7756267276  
C 3.9929737848 2.2119115079 0.8106819619  
C 2.029946134 0.8882526839 1.1362105227  
C 2.4596303202 1.7898599606 -0.9778639095  
C 3.6279094731 2.3823558862 -0.5148385085  
C 3.1868632208 1.4574988391 1.6489514562  
F 1.2783346434 0.1758646722 2.004617213  
F 2.160697708 2.0055835882 -2.2769515449  
F 4.409341431 3.1185232819 -1.3257940983  
F 3.539299524 1.2967381509 2.9366931902  
F 5.1173597006 2.7749694738 1.2805720018  
C -4.1637923993 2.1769132937 0.8507044472  
C -3.0041487873 0.4584369778 -0.33674273  
C -1.7791767927 2.1892501282 0.6417738525  
C -2.9446918393 2.7779730852 1.1172541516  
C -4.1975015159 1.0031101582 0.1137102199  
F -3.0995078171 -0.6855317499 -1.051652601  
F -0.6297459067 2.8377588583 0.9349040095  
F -2.9122682301 3.9193191527 1.828434364  
F -5.3806429486 0.4199288244 -0.1484763586  
F -5.3031215021 2.7278508346 1.2986870021  
H -0.1784898373 0.1891075835 -2.4698287804

### **NH<sub>3</sub>**

N 0. 0. 0.9667538016  
H 0.9404843854 0. 1.3431277774  
H -0.4702421927 0.8144833696 1.3431277774  
H -0.4702421927 -0.8144833696 1.3431277774

### **[NH<sub>4</sub>]<sup>+</sup>**

H -0.0000003661 -0.0000000177 -0.0239715736  
N 0.0000000622 -0.0000000005 0.9999876585  
H 0.9653982271 -0.0000139124 1.3413069988  
H -0.4827108591 -0.836052248 1.3413076185  
H -0.4826867531 0.8360661759 1.3413075905

### **N(C<sub>6</sub>H<sub>5</sub>)<sub>3</sub>**

6 -0.68235 1.24222 -0.00091  
7 -0.00011 -0.00049 -0.00186  
6 1.41725 -0.03 -0.001  
6 -0.7347 -1.2128 -0.00078  
6 -2.03266 3.70031 0.00182  
6 -0.24047 2.29668 0.80487  
6 -1.80976 1.43644 -0.8057  
6 -2.47973 2.65206 -0.79551

|   |          |          |          |
|---|----------|----------|----------|
| 6 | -0.90709 | 3.51426  | 0.79742  |
| 1 | 0.62657  | 2.15714  | 1.43521  |
| 1 | -2.15773 | 0.63112  | -1.43731 |
| 1 | -3.34956 | 2.7832   | -1.42599 |
| 1 | -0.55046 | 4.31759  | 1.42891  |
| 1 | -2.55348 | 4.64814  | 0.00298  |
| 6 | -2.18901 | -3.61139 | 0.00094  |
| 6 | -1.87528 | -1.35396 | 0.79664  |
| 6 | -0.33285 | -2.29028 | -0.7973  |
| 6 | -1.05098 | -3.47817 | -0.78747 |
| 6 | -2.59646 | -2.54    | 0.78865  |
| 1 | -2.19336 | -0.53079 | 1.42094  |
| 1 | 0.54374  | -2.19209 | -1.42218 |
| 1 | -0.72456 | -4.2997  | -1.41186 |
| 1 | -3.4754  | -2.62984 | 1.4137   |
| 1 | -2.74978 | -4.53613 | 0.00143  |
| 6 | 4.22125  | -0.08842 | 0.00031  |
| 6 | 2.14835  | 0.84913  | -0.80663 |
| 6 | 2.11039  | -0.93849 | 0.80565  |
| 6 | 3.49808  | -0.96926 | 0.79755  |
| 6 | 3.53618  | 0.82201  | -0.79736 |
| 1 | 1.62421  | 1.55266  | -1.43825 |
| 1 | 1.55689  | -1.61943 | 1.43695  |
| 1 | 4.01619  | -1.67883 | 1.42954  |
| 1 | 4.08389  | 1.50949  | -1.42878 |
| 1 | 5.3025   | -0.11103 | 0.00079  |

**[HN(C<sub>6</sub>H<sub>5</sub>)<sub>3</sub>]<sup>+</sup>**

|   |               |               |               |
|---|---------------|---------------|---------------|
| C | 1.3372710922  | 0.573486924   | 0.2785192115  |
| C | -0.1719812936 | -1.444854196  | 0.2785192115  |
| C | -1.1652897841 | 0.8713672708  | 0.2785192115  |
| C | 3.8360678542  | 1.5592389113  | -0.3285425154 |
| C | 2.4011953855  | 0.2756499909  | 1.1171144574  |
| C | 1.4888057634  | 1.353259959   | -0.8544834414 |
| C | 2.7561307975  | 1.8440225313  | -1.1549233176 |
| C | 3.6586342123  | 0.7777984455  | 0.8083597686  |
| H | 2.2626152606  | -0.3437856824 | 1.9949290314  |
| H | 0.6477616892  | 1.5912652586  | -1.488427676  |
| H | 2.8912964065  | 2.4564428677  | -2.0353097029 |
| H | 4.4949058809  | 0.5587755034  | 1.4571011317  |
| H | 4.8153782542  | 1.9503385197  | -0.5663303163 |
| C | -3.268374428  | 2.5425127519  | -0.3285425154 |
| C | -1.4393175806 | 1.941671203   | 1.1171144574  |
| C | -1.9163603773 | 0.6127136281  | -0.8544834414 |
| C | -2.9750357491 | 1.4648680163  | -1.1549233176 |
| C | -2.502910312  | 2.7795709434  | 0.8083597686  |

H -0.833580489 2.131375131 1.9949290314  
H -1.7019569758 -0.2346545557 -1.488427676  
H -3.5729901227 1.2757146992 -2.0353097029  
H -2.7313667146 3.6133149239 1.4571011317  
H -4.0967318243 3.1950706323 -0.5663303163  
C -0.5676934117 -4.1017516645 -0.3285425154  
C 0.4275546284 -1.9659735884 -0.8544834414  
C -0.9618777904 -2.2173211952 1.1171144574  
C -1.1557238857 -3.5573693902 0.8083597686  
C 0.2189049661 -3.3088905489 -1.1549233176  
H 1.0541953011 -1.3566107041 -1.488427676  
H -1.4290347571 -1.7875894499 1.9949290314  
H -1.7635391518 -4.1720904287 1.4571011317  
H 0.6816937308 -3.7321575682 -2.0353097029  
H -0.7186464154 -5.1454091533 -0.5663303163  
N 0.0000000048 -0.0000000004 0.6477995954  
H 0.0000000048 -0.0000000004 1.668180166

**N(2,6-Me<sub>2</sub>C<sub>6</sub>H<sub>3</sub>)<sub>3</sub>**

C 0.4173324426 -1.3701134395 0.0026934694  
C -1.3952192722 0.3236362077 0.0026934694  
C 0.9778868073 1.0464772148 0.0026934694  
C 1.2303899838 -4.0608345152 -0.004955363  
C -0.1453941944 -2.2874748806 0.9204932807  
C 1.3933175084 -1.817447676 -0.9184752393  
C 1.7881329122 -3.1544238804 -0.8910171192  
C 0.2660724869 -3.6191634541 0.8852330577  
C -1.1538774291 -1.8985160297 1.9711567184  
C 2.0163801057 -0.9307907934 -1.9661042778  
H 2.5341298126 -3.4875669527 -1.6016743372  
H -0.1698693899 -4.3139980946 1.5920234752  
H 1.5424460029 -5.0966916828 -0.0084789849  
C 2.9015908428 3.0959662381 -0.004955363  
C 2.0537084382 1.0178223723 0.9204932807  
C 0.8772970872 2.1153721937 -0.9184752393  
C 1.8377447426 3.1257804654 -0.8910171192  
C 3.0012512322 2.0400072578 0.8852330577  
C 2.2211018098 -0.0500291537 1.9711567184  
C -0.2021015962 2.2116317898 -1.9661042778  
H 1.7532566561 3.9384042685 -1.6016743372  
H 3.8209666208 2.0098878383 1.5920234752  
H 3.6426414551 3.8841432617 -0.0084789849  
C -4.1319808489 0.9648682601 -0.004955363  
C -2.2706146179 -0.2979245347 -0.9184752393  
C -1.9083142661 1.2696524912 0.9204932807  
C -3.2673237413 1.5791561792 0.8852330577

C -3.625877677 0.028643398 -0.8910171192  
C -1.8142785318 -1.2808410134 -1.9661042778  
C -1.0672244029 1.9485451664 1.9711567184  
H -3.6510972531 2.3041102394 1.5920234752  
H -4.287386491 -0.4508373328 -1.6016743372  
H -5.1850874802 1.212548404 -0.0084789849  
N -0.0000000074 -0.0000000057 0.0049870688  
H 2.930325683 0.2845215315 2.7272290701  
H 2.5940524023 -0.9878616454 1.5568774747  
H 1.2822186128 -0.281700637 2.471247483  
H -0.8850692205 -0.9695835883 2.471247483  
H -1.2187599735 -2.6799972635 2.7272290701  
H -2.1525394878 -1.7525844714 1.5568774747  
H -0.4415129368 2.7404460998 1.5568774747  
H -0.3971494145 1.2512842083 2.471247483  
H -1.7115657317 2.395475715 2.7272290701  
H 0.0834776218 2.9412024455 -2.7228334255  
H -1.1611426125 2.5222189239 -1.5490463592  
H -0.3728016921 1.2595888355 -2.4660301852  
H -0.9044350998 -0.9526501557 -2.4660301852  
H -2.5888948624 -1.3983074837 -2.7228334255  
H -1.6037343717 -2.2666884639 -1.5490463592  
H 2.5054172184 -1.5428949788 -2.7228334255  
H 2.764876962 -0.255530477 -1.5490463592  
H 1.2772367697 -0.3069386967 -2.4660301852

**[HN(2,6-Me<sub>2</sub>C<sub>6</sub>H<sub>3</sub>)<sub>3</sub>]<sup>+</sup>**

6 0.86563 -1.22056 0.07033  
6 0.62337 1.35958 0.07104  
6 -1.49025 -0.13931 0.06973  
6 2.39118 -3.51497 -0.19446  
6 1.82675 -1.26718 -0.94966  
6 0.66842 -2.28325 0.97053  
6 1.44297 -3.42948 0.81023  
6 2.57463 -2.44482 -1.0508  
6 2.13772 -0.18826 -1.95858  
6 -0.32371 -2.24837 2.10741  
1 1.29927 -4.25604 1.49248  
1 3.31752 -2.51046 -1.83378  
1 2.98823 -4.40935 -0.30671  
6 -4.24003 -0.30837 -0.1961  
6 -2.01203 -0.94609 -0.95146  
6 -2.311 0.56257 0.97102  
6 -3.69097 0.4673 0.81034  
6 -3.40593 -1.00233 -1.05339  
6 -1.23292 -1.75515 -1.95987

|   |          |          |          |
|---|----------|----------|----------|
| 6 | -1.78371 | 1.40077  | 2.11007  |
| 1 | -4.33446 | 1.00479  | 1.49322  |
| 1 | -3.83484 | -1.61069 | -1.83776 |
| 1 | -5.31319 | -0.37622 | -0.30882 |
| 6 | 1.85115  | 3.82569  | -0.19543 |
| 6 | 1.63932  | 1.72101  | 0.97401  |
| 6 | 0.1876   | 2.21307  | -0.95263 |
| 6 | 0.83554  | 3.4484   | -1.05476 |
| 6 | 2.24633  | 2.96407  | 0.81326  |
| 6 | 2.10006  | 0.84647  | 2.11462  |
| 6 | -0.89938 | 1.94107  | -1.96419 |
| 1 | 0.52524  | 4.1227   | -1.84106 |
| 1 | 3.03144  | 3.25387  | 1.49808  |
| 1 | 2.32887  | 4.78901  | -0.30855 |
| 1 | -1.90847 | -2.08874 | -2.74432 |
| 1 | -0.78451 | -2.64256 | -1.51455 |
| 1 | -0.43448 | -1.19453 | -2.43824 |
| 1 | 1.2534   | 0.21857  | -2.44136 |
| 1 | 2.76887  | -0.60587 | -2.73976 |
| 1 | 2.67715  | 0.64676  | -1.51297 |
| 1 | -1.89362 | 1.99445  | -1.52213 |
| 1 | -0.80964 | 0.96972  | -2.44277 |
| 1 | -0.8495  | 2.69326  | -2.74824 |
| 1 | -2.61179 | 1.76068  | 2.71523  |
| 1 | -1.22128 | 2.2692   | 1.76793  |
| 1 | -1.13725 | 0.8346   | 2.78787  |
| 1 | 1.28647  | 0.57442  | 2.79429  |
| 1 | 2.82851  | 1.38271  | 2.71738  |
| 1 | 2.56749  | -0.07741 | 1.77468  |
| 1 | -0.21712 | -3.14305 | 2.71549  |
| 1 | -1.35662 | -2.2037  | 1.76279  |
| 1 | -0.1641  | -1.40237 | 2.78308  |
| 7 | -0.00063 | -0.00058 | 0.34361  |
| 1 | -0.00164 | -0.00094 | 1.36561  |

### **PH<sub>3</sub>**

P 0. 0. 0.7746577796  
H 1.1919108412 0. 1.5429335046  
H -0.5959554206 1.0322250675 1.5429335046  
H -0.5959554206 -1.0322250675 1.5429335046

### **[PH<sub>4</sub>]<sup>+</sup>**

H -0.0000005011 0.000000215 -0.3972940239  
P 0.0000000611 0. 0.9999876541  
H 1.317370048 -0.0000189925 1.4657476833



H -0.658701093 -1.140866227 1.4657484608  
H -0.6586682094 1.140885198 1.465748496

**PPh<sub>3</sub>**

C 0.056123985 1.6633835603 0.5626971875  
P 0.0000000066 0.0000000007 1.3575583748  
C 1.4124704362 -0.8802965703 0.5626971875  
C -1.4685944016 -0.783086988 0.5626971875  
C 0.2329527583 4.2614307172 -0.4807813092  
C 0.8762405254 2.6248663594 1.1648065468  
C -0.6842010159 2.032059823 -0.563104462  
C -0.5983377646 3.3216372729 -1.0781893107  
C 0.9730558887 3.908419667 0.6430828004  
H 1.4404666136 2.3646063013 2.0521464335  
H -1.334091602 1.3123728893 -1.0412844183  
H -1.181789869 3.5897348101 -1.9496338717  
H 1.6168071262 4.6358016774 1.120402895  
H 0.298686753 5.2639727538 -0.8826643506  
C -3.8069836263 -1.9289723567 -0.4807813092  
C -2.7113212011 -0.5535866295 1.1648065468  
C -1.4177149104 -1.6085653772 -0.563104462  
C -2.5774533678 -2.1789943453 -1.0781893107  
C -3.8713186541 -1.1115187192 0.6430828004  
H -2.7680424232 0.0651775254 2.0521464335  
H -0.4695024499 -1.8115436676 -1.0412844183  
H -2.5179065935 -2.8183274582 -1.9496338717  
H -4.8231255722 -0.917704799 1.120402895  
H -4.7080774957 -2.3733160657 -0.8826643506  
C 3.5740308877 -2.3324583585 -0.4807813092  
C 2.1019159459 -0.4234944438 -0.563104462  
C 1.8350806953 -2.0712797278 1.1648065468  
C 2.8982627851 -2.7969009457 0.6430828004  
C 3.1757911521 -1.1426429255 -1.0781893107  
H 1.8035940716 0.4991707804 -1.0412844183  
H 1.3275758293 -2.4297838246 2.0521464335  
H 3.2063184657 -3.7180968763 1.120402895  
H 3.6996964822 -0.7714073498 -1.9496338717  
H 4.4093907624 -2.8906566861 -0.8826643506

**[HP(C<sub>6</sub>H<sub>5</sub>)<sub>3</sub>]<sup>+</sup>**

C 0.9071741838 -1.4620438668 0.3394635432  
C -1.7197542307 -0.0546139558 0.3394635432  
C 0.8125800335 1.5166578296 0.3394635432  
C 2.2646600659 -3.7632782665 -0.4092707753  
C 0.689020089 -2.6575840825 1.0350951121  
C 1.807225519 -1.4204629374 -0.7288502948

|   |               |               |               |
|---|---------------|---------------|---------------|
| C | 2.4816968981  | -2.5766933519 | -1.1004069976 |
| C | 1.3708341122  | -3.8040761555 | 0.6576941053  |
| H | -0.0029689374 | -2.6959927113 | 1.8669571582  |
| H | 1.9888546587  | -0.4961649688 | -1.2597785135 |
| H | 3.1803441986  | -2.547439036  | -1.9248660354 |
| H | 1.2097846166  | -4.7267857205 | 1.1974362175  |
| H | 2.7972203209  | -4.6590302902 | -0.6982205843 |
| C | 2.1267645427  | 3.8428922886  | -0.4092707753 |
| C | 1.957025279   | 1.9255009493  | 1.0350951121  |
| C | 0.3265442247  | 2.2753346858  | -0.7288502948 |
| C | 0.9906334468  | 3.4375592415  | -1.1004069976 |
| C | 2.6090095278  | 3.0892152506  | 0.6576941053  |
| H | 2.3362826405  | 1.3454251877  | 1.8669571582  |
| H | -0.5647358665 | 1.9704811506  | -1.2597785135 |
| H | 0.6159748158  | 4.0279783941  | -1.9248660354 |
| H | 3.4886241992  | 3.4110970787  | 1.1974362175  |
| H | 2.6362284233  | 4.7519790103  | -0.6982205843 |
| C | -4.391424622  | -0.0796140152 | -0.4092707753 |
| C | -2.1337697571 | -0.8548717415 | -0.7288502948 |
| C | -2.6460453813 | 0.7320831401  | 1.0350951121  |
| C | -3.9798436533 | 0.7148609119  | 0.6576941053  |
| C | -3.4723303582 | -0.8608658827 | -1.1004069976 |
| H | -1.4241188055 | -1.4743161748 | -1.2597785135 |
| H | -2.3333137164 | 1.3505675305  | 1.8669571582  |
| H | -4.6984088292 | 1.3156886488  | 1.1974362175  |
| H | -3.7963190278 | -1.4805393511 | -1.9248660354 |
| H | -5.4334487575 | -0.0929487131 | -0.6982205843 |
| P | -0.0000000044 | 0.0000000023  | 0.8365735758  |
| H | -0.0000000044 | 0.0000000023  | 2.2376547329  |

### **P(2,6-Me<sub>2</sub>C<sub>6</sub>H<sub>3</sub>)<sub>3</sub>**

|   |          |          |          |
|---|----------|----------|----------|
| 6 | -0.90344 | -1.5019  | 0.11549  |
| 6 | -0.85017 | 1.53571  | 0.11432  |
| 6 | 1.75649  | -0.03318 | 0.11463  |
| 6 | -2.33282 | -3.88562 | -0.32658 |
| 6 | -2.04575 | -1.81751 | 0.8973   |
| 6 | -0.49836 | -2.39985 | -0.89942 |
| 6 | -1.22043 | -3.57986 | -1.09119 |
| 6 | -2.74381 | -2.99855 | 0.65455  |
| 6 | -2.55938 | -0.91186 | 1.98947  |
| 6 | 0.66035  | -2.15729 | -1.83352 |
| 1 | -0.90497 | -4.26087 | -1.87154 |
| 1 | -3.61722 | -3.22343 | 1.25329  |
| 1 | -2.87848 | -4.80419 | -0.49829 |
| 6 | 4.53692  | -0.07724 | -0.32043 |
| 6 | 2.59748  | -0.87782 | 0.88616  |

|    |          |          |          |
|----|----------|----------|----------|
| 6  | 2.33581  | 0.77952  | -0.88748 |
| 6  | 3.71928  | 0.74523  | -1.07571 |
| 6  | 3.96983  | -0.89054 | 0.64685  |
| 6  | 2.06548  | -1.78994 | 1.96394  |
| 6  | 1.55032  | 1.67507  | -1.81244 |
| 1  | 4.15396  | 1.37005  | -1.84578 |
| 1  | 4.59853  | -1.5444  | 1.2377   |
| 1  | 5.60578  | -0.08953 | -0.48887 |
| 6  | -2.21228 | 3.96073  | -0.3182  |
| 6  | -1.84437 | 1.62786  | -0.88782 |
| 6  | -0.54392 | 2.68694  | 0.88652  |
| 6  | -1.22392 | 3.87945  | 0.64872  |
| 6  | -2.5112  | 2.84074  | -1.07434 |
| 6  | -2.22196 | 0.50021  | -1.81514 |
| 6  | 0.5137   | 2.68604  | 1.96271  |
| 1  | -0.97489 | 4.75107  | 1.24056  |
| 1  | -3.26994 | 2.90298  | -1.84416 |
| 1  | -2.74018 | 4.89039  | -0.48561 |
| 15 | 0.00198  | 0.00135  | 0.69378  |
| 1  | 2.88706  | -2.28363 | 2.481    |
| 1  | 1.41381  | -2.56663 | 1.55938  |
| 1  | 1.47421  | -1.23894 | 2.69685  |
| 1  | -1.77938 | -0.68306 | 2.7171   |
| 1  | -3.3928  | -1.38213 | 2.50937  |
| 1  | -2.91008 | 0.04503  | 1.59813  |
| 1  | 1.51281  | 2.51926  | 1.55559  |
| 1  | 0.34009  | 1.89378  | 2.69249  |
| 1  | 0.52383  | 3.64247  | 2.48341  |
| 1  | 2.17112  | 1.96699  | -2.65866 |
| 1  | 1.21266  | 2.58764  | -1.32084 |
| 1  | 0.66136  | 1.18451  | -2.20309 |
| 1  | -1.34878 | -0.00525 | -2.22253 |
| 1  | -2.80352 | 0.88844  | -2.65029 |
| 1  | -2.82219 | -0.26288 | -1.31988 |
| 1  | 0.59376  | -2.83082 | -2.68708 |
| 1  | 1.62407  | -2.32754 | -1.35304 |
| 1  | 0.67665  | -1.13771 | -2.21223 |

**[HP(2,6-Me<sub>2</sub>C<sub>6</sub>H<sub>3</sub>)<sub>3</sub>]<sup>+</sup>**

|   |               |               |               |
|---|---------------|---------------|---------------|
| C | 0.4885741616  | -1.7075927193 | 0.2461493602  |
| C | -1.7251910428 | 0.4279220962  | 0.2081074138  |
| C | 1.2301499969  | 1.2774878563  | 0.290717676   |
| C | 1.2374962042  | -4.3641665829 | -0.1107153919 |
| C | -0.0665525381 | -2.7109556603 | 1.0807343056  |
| C | 1.411034509   | -2.0370235766 | -0.7725751355 |
| C | 1.7673905816  | -3.3759263523 | -0.9234856208 |

C 0.325523403 -4.0312573173 0.8776088291  
C -1.0573101668 -2.4305955133 2.184335637  
C 2.0392103637 -1.0436193639 -1.7169230051  
H 2.4697801086 -3.6428800444 -1.7013760647  
H -0.0957240559 -4.8046760241 1.5055067611  
H 1.5296096792 -5.3958473084 -0.252610552  
C 3.1716609672 3.2508057256 0.0040591533  
C 2.3373779911 1.3059469236 1.1765343193  
C 1.1013948757 2.2317157385 -0.7437525497  
C 2.089115936 3.2082541058 -0.8586620442  
C 3.2935597889 2.3036429671 1.0077180203  
C 2.5388066319 0.3178788469 2.2996043829  
C -0.0286590565 2.2704922084 -1.7411111758  
H 2.0051239922 3.9428679073 -1.6479761641  
H 4.1444213108 2.3312054546 1.6749186727  
H 3.9251643328 4.018213063 -0.1106068611  
C -4.3886519705 1.1202817998 -0.2069049922  
C -2.4395004957 -0.170076999 -0.8546326616  
C -2.3427829505 1.3807213568 1.0579242645  
C -3.6756288976 1.7085288105 0.8250210163  
C -3.7722360984 0.196115441 -1.0339178479  
C -1.8636117672 -1.1772773566 -1.8175186076  
C -1.6394983441 2.0593872961 2.2081162896  
H -4.1545338483 2.4377482027 1.46437292  
H -4.3300216604 -0.2510866942 -1.8454684508  
H -5.4235391412 1.3881767024 -0.3714361542  
P -0.0116607426 -0.0039357873 0.6213587416  
H -0.0471039307 -0.0158986919 2.0123479413  
H 3.5294934754 0.4417198897 2.7305854597  
H 2.4537791576 -0.7188241229 1.9725948535  
H 1.8199970374 0.4708745534 3.1091416204  
H -0.5909958958 -1.9133234104 3.027203379  
H -1.4576898022 -3.3648895495 2.5707712925  
H -1.902651491 -1.8273485893 1.8520569202  
H -0.6849970022 2.5009886395 1.9203083793  
H -1.4501392514 1.3678095328 3.0335306034  
H -2.2607170649 2.8594069314 2.6038404341  
H 0.240173895 2.9137487877 -2.5761805681  
H -0.9440460303 2.6687130703 -1.302462992  
H -0.2677910662 1.2910778935 -2.1510905795  
H -0.8779981829 -0.8985354627 -2.185470301  
H -2.516319134 -1.2736696983 -2.6824305583  
H -1.7714423453 -2.1650847693 -1.3651175587  
H 2.4878185938 -1.5686344256 -2.557459092  
H 2.8274010682 -0.465855193 -1.2333225789  
H 1.3229367973 -0.332751034 -2.1245233306

### AsH<sub>3</sub>

As 0. 0. 0.7474250968  
H 1.2669844535 0. 1.59568425  
H -0.6334922268 1.097240723 1.59568425  
H -0.6334922268 -1.097240723 1.59568425

### [AsH<sub>4</sub>]<sup>+</sup>

H -0.0000005394 0.0000000228 -0.4905581282  
As 0.000000061 0. 0.999987654  
H 1.4053003014 -0.00002026 1.496835682  
H -0.702667298 -1.2170154162 1.4968365125  
H -0.7026322199 1.2170356533 1.4968365498

### AsPh<sub>3</sub>

C -0.0000471358 1.7512119751 0.2731090265  
As 0.0000000513 0.0000001154 1.1916758181  
C 1.5166176028 -0.8755649493 0.2731090265  
C -1.5165703131 -0.8756466797 0.2731090265  
C 0.0687098707 4.3085622405 -0.864940931  
C 0.7770366198 2.7633504975 0.8416302119  
C -0.751396817 2.0396739918 -0.8657891855  
C -0.7175243999 3.311566284 -1.4304099057  
C 0.8181659263 4.0315329354 0.2734358422  
H 1.354417385 2.5630731492 1.736409761  
H -1.3683624889 1.2745618163 -1.316962491  
H -1.3070692713 3.5214527824 -2.3137477631  
H 1.4286438539 4.8036389172 0.7236821746  
H 0.0935414367 5.2968970864 -1.3049214116  
C -3.7656791126 -2.0947764981 -0.864940931  
C -2.7816498635 -0.7087416677 0.8416302119  
C -1.390710907 -1.6705655991 -0.8657891855  
C -2.5091381514 -2.2771773715 -1.4304099057  
C -3.9004927245 -1.3072138623 0.2734358422  
H -2.8968949746 -0.1085765832 1.736409761  
H -0.4196214903 -1.8223174565 -1.316962491  
H -2.3961327553 -2.892681456 -2.3137477631  
H -4.874395083 -1.1645774595 0.7236821746  
H -4.6340179795 -2.5674391541 -1.3049214116  
C 3.6969693957 -2.2137853963 -0.864940931  
C 2.1421078779 -0.3691080465 -0.8657891855  
C 2.0046133975 -2.0546084837 0.8416302119  
C 3.0823269521 -2.7243187269 0.2734358422  
C 3.2266627052 -1.0343885663 -1.4304099057  
H 1.7879841331 0.5477559863 -1.316962491

H 1.5424777435 -2.4544962198 1.736409761  
H 3.4457513829 -3.6390611116 0.7236821746  
H 3.7032021805 -0.6287709802 -2.3137477631  
H 4.5404766967 -2.7294575861 -1.3049214116

**[HAsPh<sub>3</sub>]<sup>+</sup>**

C 0.1247755409 -1.8350047098 0.3541708872  
C -1.6515484677 0.809443564 0.3541708872  
C 1.5267729207 1.0255611438 0.3541708872  
C 0.2732584614 -4.483156455 -0.4323234356  
C -0.651284225 -2.7913553469 1.0111039611  
C 0.9740943205 -2.1922775521 -0.6916824531  
C 1.0424128213 -3.5248340566 -1.0824785532  
C -0.5713154773 -4.1186135544 0.612308818  
H -1.3087741534 -2.5160823115 1.825769996  
H 1.5817011583 -1.4508819495 -1.1925267796  
H 1.6998079966 -3.8117200381 -1.8914281781  
H -1.1645917232 -4.8669132391 1.1191645012  
H 0.3339418167 -5.5188046504 -0.7374241896  
C 3.7458981449 2.4782269976 -0.4323234356  
C 2.7430267503 0.8316489903 1.0111039611  
C 1.4115208884 1.939729204 -0.6916824531  
C 2.5313894229 2.6651730135 -1.0824785532  
C 3.8524817015 1.5645330611 0.612308818  
H 2.8333782729 0.1246094918 1.825769996  
H 0.4656500434 2.0952343598 -1.1925267796  
H 2.4511423832 3.3779369264 -1.8914281781  
H 4.797166361 1.424890603 1.1191645012  
H 4.6124541138 3.0486044226 -0.7374241896  
C -4.0191566123 2.0049294554 -0.4323234356  
C -2.385615215 0.2525483461 -0.6916824531  
C -2.0917425314 1.9597063546 1.0111039611  
C -3.2811662303 2.5540804913 0.612308818  
C -3.5738022502 0.8596610411 -1.0824785532  
H -2.0473512078 -0.6443524123 -1.1925267796  
H -1.5246041256 2.3914728177 1.825769996  
H -3.6325746439 3.4420226341 1.1191645012  
H -4.1509503859 0.4337831097 -1.8914281781  
H -4.9463959366 2.4702002258 -0.7374241896  
As -0.000000002 -0.000000007 0.9063555478  
H -0.000000002 -0.000000007 2.4096623835

**As(2,6-Me<sub>2</sub>C<sub>6</sub>H<sub>3</sub>)<sub>3</sub>**

C -1.7492009914 0.6481158434 -0.1883312107  
C 1.4358852798 1.1907945727 -0.1883312107  
C 0.3133157099 -1.838910416 -0.1883312107

|    |               |               |               |
|----|---------------|---------------|---------------|
| C  | -4.3360464466 | 1.6003727855  | 0.3462892626  |
| C  | -1.9562495496 | 1.5948254955  | 0.8359609541  |
| C  | -2.8549110545 | 0.1790407309  | -0.9358730548 |
| C  | -4.1323124228 | 0.6598826354  | -0.6498736628 |
| C  | -3.2534651725 | 2.0556729232  | 1.0787514763  |
| C  | -0.8658911557 | 2.1366101469  | 1.7256349027  |
| C  | -2.7230493797 | -0.8489197519 | -2.0350431582 |
| H  | -4.973482794  | 0.2884968179  | -1.2216231099 |
| H  | -3.4087732499 | 2.7787674944  | 1.8696999029  |
| H  | -5.3316097695 | 1.9696405927  | 0.5554905395  |
| C  | 0.7820597347  | -4.5553127669 | 0.3462892626  |
| C  | -0.4030346198 | -2.4915745533 | 0.8359609541  |
| C  | 1.2724017051  | -2.5619458636 | -0.9358730548 |
| C  | 1.4946810848  | -3.9086288517 | -0.6498736628 |
| C  | -0.1535323879 | -3.8454199508 | 1.0787514763  |
| C  | -1.4174130882 | -1.8181888106 | 1.7256349027  |
| C  | 2.0967107599  | -1.933770062  | -2.0350431582 |
| H  | 2.236895823   | -4.4514108533 | -1.2216231099 |
| H  | -0.7020966172 | -4.3414679768 | 1.8696999029  |
| H  | 0.9600460943  | -5.6021297992 | 0.5554905395  |
| C  | 3.5539867102  | 2.9549399816  | 0.3462892626  |
| C  | 1.5825093476  | 2.3829051328  | -0.9358730548 |
| C  | 2.3592841676  | 0.8967490579  | 0.8359609541  |
| C  | 3.4069975587  | 1.7897470277  | 1.0787514763  |
| C  | 2.6376313363  | 3.2487462163  | -0.6498736628 |
| C  | 0.626338618   | 2.7826898141  | -2.0350431582 |
| C  | 2.2833042422  | -0.3184213362 | 1.7256349027  |
| H  | 4.1108698654  | 1.5627004825  | 1.8696999029  |
| H  | 2.7365869694  | 4.1629140355  | -1.2216231099 |
| H  | 4.3715636735  | 3.6324892066  | 0.5554905395  |
| As | -0.0000000006 | 0.            | -0.9011315983 |
| H  | -1.6347125161 | -2.4508311775 | 2.5854939453  |
| H  | -2.3583569009 | -1.6279659745 | 1.2093849403  |
| H  | -1.0657720714 | -0.8579414042 | 2.0971961563  |
| H  | -0.2101130162 | 1.3519563902  | 2.0971961563  |
| H  | -1.305125803  | 2.6411181551  | 2.5854939453  |
| H  | -0.2306814408 | 2.8563799741  | 1.2093849403  |
| H  | 2.58903834    | -1.2284139996 | 1.2093849403  |
| H  | 1.2758850859  | -0.4940149858 | 2.0971961563  |
| H  | 2.9398383173  | -0.1902869775 | 2.5854939453  |
| H  | 2.7780101191  | -2.6683259217 | -2.4623100675 |
| H  | 2.6982279506  | -1.0980715035 | -1.6722035449 |
| H  | 1.4691429461  | -1.5440976286 | -2.8382755312 |
| H  | 0.6026562984  | 2.044363928   | -2.8382755312 |
| H  | 0.9218329734  | 3.7399902965  | -2.4623100675 |
| H  | -0.398156159  | 2.8857697027  | -1.6722035449 |

H -3.6998430942 -1.0716643747 -2.4623100675  
H -2.3000717934 -1.7876981991 -1.6722035449  
H -2.0717992462 -0.5002662993 -2.8382755312

**[HAs(2,6-Me<sub>2</sub>C<sub>6</sub>H<sub>3</sub>)<sub>3</sub>]<sup>+</sup>**

6 -1.65154 -0.95915 -0.04182  
6 1.65647 -0.95174 -0.0489  
6 -0.00294 1.90414 -0.04753  
6 -4.03325 -2.32216 0.33101  
6 -1.95856 -2.04709 -0.88594  
6 -2.51218 -0.55367 0.99499  
6 -3.70499 -1.25855 1.15579  
6 -3.16436 -2.71354 -0.67466  
6 -1.06082 -2.52758 -1.99935  
6 -2.23119 0.58485 1.94144  
1 -4.38008 -0.96548 1.94849  
1 -3.41582 -3.55299 -1.30881  
1 -4.96364 -2.85343 0.47859  
6 -0.01362 4.64737 0.33028  
6 -0.79772 2.70934 -0.89051  
6 0.77553 2.45083 0.9894  
6 0.7508 3.83586 1.15274  
6 -0.78257 4.08666 -0.67659  
6 -1.65813 2.16771 -2.00543  
6 1.62891 1.64346 1.93331  
1 1.33914 4.27725 1.94587  
1 -1.38881 4.72102 -1.30913  
1 -0.01736 5.71839 0.48049  
6 4.04307 -2.30466 0.32855  
6 1.74509 -1.89762 0.98922  
6 2.74929 -0.66351 -0.89344  
6 3.93737 -1.36027 -0.67959  
6 2.95958 -2.56408 1.15211  
6 0.6216 -2.23466 1.9356  
6 2.70451 0.35086 -2.00962  
1 4.78847 -1.15024 -1.31327  
1 3.05122 -3.29273 1.94627  
1 4.97465 -2.83306 0.47886  
33 -0.00011 -0.00435 -0.44478  
1 -0.00374 -0.00521 -1.93895  
1 -2.31863 2.94646 -2.37946  
1 -2.28747 1.33532 -1.68758  
1 -1.05708 1.82619 -2.85214  
1 -1.05281 -1.83289 -2.84326  
1 -1.41521 -3.48304 -2.37905  
1 -0.02843 -2.67076 -1.67737



|   |          |          |          |
|---|----------|----------|----------|
| 1 | 2.2956   | 1.31078  | -1.69147 |
| 1 | 2.10718  | -0.00188 | -2.85438 |
| 1 | 3.70755  | 0.53697  | -2.38633 |
| 1 | 1.91902  | 2.25382  | 2.78571  |
| 1 | 2.5439   | 1.29183  | 1.45555  |
| 1 | 1.11202  | 0.76797  | 2.32442  |
| 1 | 0.1295   | -1.34962 | 2.33799  |
| 1 | 1.00606  | -2.80082 | 2.78113  |
| 1 | -0.14685 | -2.84231 | 1.45675  |
| 1 | -2.90853 | 0.53698  | 2.79127  |
| 1 | -2.37195 | 1.55533  | 1.4647   |
| 1 | -1.21619 | 0.56285  | 2.33659  |

**Total energies  $E^0$ , standard enthalpies  $H^0_{298}$  in Hartree,**

| <b>Compound</b> | <b>B3LYP/def2-TZVPP<br/><math>E^0</math></b> |
|-----------------|----------------------------------------------|
| Crypt_B_N       | -3541.12212                                  |
| Crypt_BH_HN     | -3542.34569                                  |
| Crypt_B_P       | -3758.694674                                 |
| Crypt_BH_HP     | -3759.922162                                 |
| Crypt_B_As      | -5441.116359                                 |
| Crypt_BH_HAs    | -5442.344985                                 |
| <br>            |                                              |
| Crypt_Al_N      | -3827.748228                                 |
| Crypt_AlH_HN    | -3828.968856                                 |
| Crypt_Al_P      | -4045.35607                                  |
| Crypt_AlH_HP    | -4046.533561                                 |
| Crypt_Al_As     | -5727.777317                                 |
| Crypt_AlH_HAs   | -5728.956968                                 |
| <br>            |                                              |
| Crypt_Ga_N      | -5722.277292                                 |
| Crypt_GaH_HN    | -5723.477033                                 |
| Crypt_Ga_P      | -5939.883478                                 |
| Crypt_GaH_HP    | -5941.040729                                 |
| Crypt_Ga_As     | -7622.30669                                  |
| Crypt_GaH_HAs   | -7623.463069                                 |

**Crypt\_B\_N**

|   |               |               |               |
|---|---------------|---------------|---------------|
| B | -2.840119453  | -0.0000003126 | 0.0000000161  |
| C | -3.2557414505 | 1.4523942127  | -0.2917580509 |
| C | -3.2557413438 | -0.4735277193 | 1.4036896224  |
| C | -3.2557412925 | -0.9788675091 | -1.111931533  |
| C | -4.5377980064 | -1.2448984342 | 3.6902837769  |
| C | -2.5397304278 | -0.8433339998 | 2.4999161977  |
| C | -4.6703679841 | -0.4685165903 | 1.3888347292  |
| C | -5.2918258347 | -0.8675620962 | 2.5717356476  |
| C | -3.1439152818 | -1.2488064193 | 3.7018685881  |
| F | -6.6150812657 | -0.921974302  | 2.7330309185  |
| F | -5.1999909231 | -1.6147537197 | 4.7866553534  |
| C | -4.5377982871 | 3.818328085   | -0.7670285776 |
| C | -4.6703680897 | 1.4370238106  | -0.2886704623 |
| C | -2.5397306179 | 2.5866574776  | -0.519609658  |
| C | -3.1439155634 | 3.8303149391  | -0.7694364771 |
| C | -5.2918260303 | 2.6609687552  | -0.5345374171 |
| C | -5.2784465215 | -0.0000004647 | -0.0000000031 |

|   |               |               |               |
|---|---------------|---------------|---------------|
| F | -6.6150814736 | 2.8278605454  | -0.5680627871 |
| F | -5.1999912872 | 4.9527413075  | -0.9949103365 |
| C | -4.5377978715 | -2.5734309063 | -2.9232551911 |
| C | -4.6703679333 | -0.9685085006 | -1.1001642617 |
| C | -2.5397303364 | -1.7433243595 | -1.9803064843 |
| C | -3.1439151465 | -2.5815095146 | -2.9324320698 |
| C | -5.2918257407 | -1.7934080556 | -2.03719824   |
| F | -6.6150811658 | -1.9058878876 | -2.1649681721 |
| F | -5.1999907482 | -3.3379889672 | -3.7917450243 |
| C | -6.818728719  | -0.0000005608 | -0.0000000152 |
| N | 3.331232224   | 0.0000000722  | 0.0000000646  |
| C | 3.7900532539  | 1.3613816143  | -0.2734752309 |
| C | 3.7900534021  | -0.9175272122 | -1.0422532571 |
| C | 3.790053354   | -0.4438540995 | 1.3157286926  |
| C | 5.3319265179  | 1.4457699604  | -0.2904271912 |
| C | 5.8464558588  | 0.4641001165  | -1.37574336   |
| C | 5.3319266242  | -0.4713672896 | 1.3972870592  |
| C | 5.8464558085  | 0.9593790573  | 1.0897940989  |
| C | 5.8464559634  | -1.4234784865 | 0.2859495142  |
| C | 5.3319266752  | -0.9744020798 | -1.106859627  |
| C | 5.8661158121  | -1.9013343955 | -2.1597964775 |
| C | 5.8661155051  | 2.821106233   | -0.5667057215 |
| C | -0.0614964318 | 6.1411422166  | -1.2336370624 |
| C | -0.0614957634 | -4.1389323852 | -4.7015667004 |
| C | 1.1309828288  | 6.4037531986  | -1.2863905213 |
| C | 5.1580372558  | 3.9396561     | -0.791400839  |
| C | 5.7611108214  | 5.2239109915  | -1.0493828745 |
| C | 1.1309835258  | -4.3159236084 | -4.9026176742 |
| C | 5.1580376846  | -2.6552010703 | -3.0161415656 |
| C | 2.4703709496  | 6.523139263   | -1.3103728526 |
| C | 2.4703716596  | -4.3963858326 | -4.994017785  |
| C | 3.6887854062  | -4.3687727347 | -4.9626511191 |
| C | 3.6887847007  | 6.4821685068  | -1.3021425928 |
| F | -1.1984167875 | -0.8186426392 | 2.4267232099  |
| C | -0.0614959803 | -2.0022102494 | 5.9352038766  |
| F | -1.1984169721 | 2.5109249268  | -0.5043964213 |
| F | -1.1984166988 | -1.6922829184 | -1.9223267016 |
| C | 5.0878277551  | -4.2991223245 | -4.8835327216 |
| C | 5.76111139    | -3.5207474602 | -3.9993478692 |
| C | 5.8661157125  | -0.9197711465 | 2.7265024526  |
| C | 5.1580375455  | -1.2844544712 | 3.8075426415  |
| C | 5.7611112055  | -1.70316286   | 5.0487309948  |
| C | 5.0878275299  | -2.07970203   | 6.1649157829  |
| C | 1.1309832996  | -2.0878297851 | 6.1890083374  |
| C | 2.4703714292  | -2.1267533748 | 6.3043908112  |
| C | 3.6887851773  | -2.1133954885 | 6.2647939141  |

C 5.0878270609 6.3788249 -1.2813828261  
C -1.2855833062 -1.8236604815 5.40592389  
C -2.3041455434 -1.6107321685 4.7747347221  
C -1.2855831087 -3.7698374779 -4.2822980206  
C -1.2855837175 5.5934973123 -1.1236257845  
C -2.3041453689 -3.3296758826 -3.7823020654  
C -2.3041459066 4.9404072135 -0.9924325957  
H 3.380521783 2.0240080288 0.4919005969  
H 6.9407659871 0.4710466622 -1.3963349765  
H 5.5067901735 0.7960201184 -2.3596625753  
H 3.3805218823 0.2313439274 2.0700373475  
H 3.3805219909 -1.4380022582 1.5068921042  
H 3.3805219653 -0.5860055447 -1.9987925061  
H 3.3805220386 -1.9083767242 -0.8346689234  
H 5.506790353 -2.4415375526 0.4904579458  
H 6.9407660934 -1.4447845275 0.2902295093  
H 6.9407659361 0.9737387573 1.1061057461  
H 5.5067900873 1.645518058 1.8692048745  
H 6.9528793108 2.8922977651 -0.5810067056  
H 6.9528796256 -1.9493150828 -2.2142995893  
H 3.3805218182 1.6770330227 -1.2353682292  
H 4.0753766501 -2.6346393137 -2.992784635  
H 5.6511591697 -4.9111505458 -5.5787583266  
H 6.8446454388 -3.5497221724 -4.0322613884  
H 6.9528795235 -0.942981788 2.7953065741  
H 4.075376512 -1.2745077482 3.7780571014  
H 6.8446452528 -1.7171793537 5.0902806625  
H 5.6511589124 -2.3757709059 7.0425606099  
H 4.0753762246 3.9091474178 -0.785272255  
H 6.8446448655 5.2669024001 -1.0580189975  
H 5.6511583766 7.2869221024 -1.4638020348  
F -7.3034139683 0.3994944505 -1.1842336276  
F -7.3034138782 -1.2253245008 0.2461439307  
F -7.3034140115 0.8258282773 0.93808964

### **Crypt\_BH\_HN**

B -2.2828920295 -0.0000002776 0.0000000203  
C -2.9790981036 1.4238090465 -0.2860158366  
C -2.9790979989 -0.4642080114 1.376063023  
C -2.9790979487 -0.959601998 -1.0900471417  
C -4.3294348836 -1.2392931057 3.6736677968  
C -2.3086466762 -0.8454812549 2.5062814083  
C -4.3880677255 -0.4638020158 1.374859248  
C -5.0473421458 -0.8579562346 2.5432607895  
C -2.9377224797 -1.2476124368 3.698329276  
F -6.3779171374 -0.9063013165 2.6865711249

|   |               |               |               |
|---|---------------|---------------|---------------|
| F | -5.0081984751 | -1.6078476249 | 4.7661834746  |
| C | -4.3294351632 | 3.8011355785  | -0.7635749306 |
| C | -4.3880678301 | 1.4225634267  | -0.2857656443 |
| C | -2.3086468669 | 2.5932435598  | -0.5209326705 |
| C | -2.9377227611 | 3.8266528322  | -0.7687008265 |
| C | -5.0473423393 | 2.6315058957  | -0.5286188919 |
| C | -4.9963902286 | -0.0000004468 | -0.0000000009 |
| F | -6.3779173418 | 2.7797887122  | -0.5584060779 |
| F | -5.0081988377 | 4.9315591102  | -0.9906552378 |
| C | -4.3294347496 | -2.5618436883 | -2.9100928533 |
| C | -4.3880676753 | -0.9587626374 | -1.0890935921 |
| C | -2.3086465847 | -1.7477631425 | -1.9853486773 |
| C | -2.9377223448 | -2.5790413506 | -2.9296284038 |
| C | -5.047342053  | -1.7735510109 | -2.0146419016 |
| F | -6.3779170394 | -1.8734889945 | -2.1281650821 |
| F | -5.0081983012 | -3.3237128278 | -3.7755282398 |
| C | -6.5373585926 | -0.0000005429 | -0.0000000013 |
| N | 3.0477740065  | 0.0000000548  | 0.0000000621  |
| C | 3.508508605   | 1.4183379219  | -0.2849166611 |
| C | 3.5085087593  | -0.955913959  | -1.0858581701 |
| C | 3.5085087093  | -0.4624237123 | 1.3707750283  |
| C | 5.039099945   | 1.4510924757  | -0.2914963883 |
| C | 5.535070532   | 0.4644365956  | -1.3767408538 |
| C | 5.0391000517  | -0.4731026247 | 1.4024311029  |
| C | 5.5350704818  | 0.9600746416  | 1.0905842577  |
| C | 5.5350706368  | -1.4245106074 | 0.2861568408  |
| C | 5.0391001029  | -0.977989314  | -1.1109344815 |
| C | 5.6172899308  | -1.8958936928 | -2.1536161661 |
| C | 5.6172896247  | 2.8130335501  | -0.5650840807 |
| C | 0.0116021849  | 6.3035641145  | -1.2662644893 |
| C | 0.0116028708  | -4.2483995079 | -4.8259144719 |
| C | 1.1915948562  | 6.6153607645  | -1.328898401  |
| C | 4.9925390347  | 3.9761683608  | -0.7987354522 |
| C | 5.7059371632  | 5.2087989393  | -1.0463471563 |
| C | 1.191595576   | -4.4585402891 | -5.0646212581 |
| C | 4.9925394674  | -2.6798091757 | -3.0440948156 |
| C | 2.5321053062  | 6.7121208927  | -1.348335618  |
| C | 2.5321060365  | -4.5237533606 | -5.1386992906 |
| C | 3.7475644863  | -4.465870558  | -5.0729481437 |
| C | 3.7475637653  | 6.6262374497  | -1.3310832653 |
| F | -0.9542110494 | -0.8462683102 | 2.5086147578  |
| C | 0.0116026485  | -2.0551650101 | 6.0921790762  |
| F | -0.9542112403 | 2.5956579449  | -0.5214176463 |
| F | -0.9542109579 | -1.7493902189 | -1.9871970192 |
| C | 5.1316825308  | -4.3219907634 | -4.9095098326 |
| C | 5.7059377299  | -3.5105624291 | -3.9877783111 |

|   |               |               |               |
|---|---------------|---------------|---------------|
| C | 5.6172898316  | -0.9171392121 | 2.7187004935  |
| C | 4.9925393272  | -1.2963586568 | 3.8428304998  |
| C | 5.7059375463  | -1.6982358484 | 5.0341257162  |
| C | 5.1316823047  | -2.0907646442 | 6.1977089899  |
| C | 1.1915953427  | -2.1568206581 | 6.3935198018  |
| C | 2.5321057998  | -2.1883674641 | 6.4870350828  |
| C | 3.7475642526  | -2.1603665963 | 6.4040316117  |
| C | 5.1316818331  | 6.4127559619  | -1.2881989221 |
| C | -1.1849411863 | -1.8597788302 | 5.5129904778  |
| C | -2.1344337653 | -1.6167165491 | 4.7924744125  |
| C | -1.1849409852 | -3.8445006781 | -4.3671107267 |
| C | -1.1849416059 | 5.704278881   | -1.1458796642 |
| C | -2.1344335904 | -3.3420466975 | -3.7963545438 |
| C | -2.13443413   | 4.9587624417  | -0.9961198041 |
| H | 3.0806733383  | 2.0518293518  | 0.4902288177  |
| H | 6.6261626384  | 0.4713024902  | -1.3970933945 |
| H | 5.1991187661  | 0.7964874109  | -2.3610478423 |
| H | 3.0806734395  | 0.2261586479  | 2.0974222849  |
| H | 3.0806735485  | -1.4504651463 | 1.5318219783  |
| H | 3.0806735234  | -0.6013640348 | -2.0220506089 |
| H | 3.0806735971  | -1.9295001658 | -0.8528519638 |
| H | 5.1991189457  | -2.4429709013 | 0.4907458716  |
| H | 6.6261627447  | -1.4455692773 | 0.2903871438  |
| H | 6.6261625874  | 0.974267621   | 1.1067065211  |
| H | 5.1991186799  | 1.6464840573  | 1.8703022075  |
| H | 6.7046823158  | 2.8129657282  | -0.5650704345 |
| H | 6.7046826219  | -1.8958478696 | -2.1535641823 |
| H | 3.0806733736  | 1.7033416886  | -1.2445701341 |
| H | 3.9094676193  | -2.7208396136 | -3.0907027445 |
| H | 5.7751609735  | -4.898796823  | -5.5647252821 |
| H | 6.7886447473  | -3.4770652584 | -3.9497276999 |
| H | 6.7046825227  | -0.91711701   | 2.718634889   |
| H | 3.909467477   | -1.3162071822 | 3.9016677946  |
| H | 6.7886445654  | -1.682031544  | 4.9860910809  |
| H | 5.7751607172  | -2.3697947828 | 7.0248454578  |
| H | 3.9094671801  | 4.0370471215  | -0.8109648436 |
| H | 6.788644186   | 5.1590976666  | -1.0363631068 |
| H | 5.7751601827  | 7.2685922806  | -1.4601199252 |
| F | -7.0322022337 | 0.399201746   | -1.183365903  |
| F | -7.0322021437 | -1.224426653  | 0.2459635761  |
| F | -7.0322022769 | 0.8252231858  | 0.9374022764  |
| H | -1.0824407726 | -0.0000002027 | 0.0000000298  |
| H | 2.0251656848  | -0.0000000089 | 0.0000000541  |

Crypt\_AI\_N

|    |               |               |               |
|----|---------------|---------------|---------------|
| Al | -2.1167439216 | -0.0000002675 | 0.0000000218  |
| C  | -2.9292903524 | 1.6797694398  | -0.3374333436 |
| C  | -2.9292902289 | -0.5476593362 | 1.6234399779  |
| C  | -2.9292901696 | -1.1321110582 | -1.286006588  |
| C  | -4.4435765951 | -1.2707945633 | 3.7670483684  |
| C  | -2.3512847639 | -0.9402616407 | 2.7872413773  |
| C  | -4.3335597633 | -0.4865550154 | 1.4423065696  |
| C  | -5.0701242017 | -0.8693208537 | 2.5769492215  |
| C  | -3.0628301933 | -1.3258253515 | 3.9301778404  |
| F  | -6.4023725537 | -0.896248098  | 2.6567700998  |
| F  | -5.2306104854 | -1.6147768912 | 4.7867240354  |
| C  | -4.4435768817 | 3.897756244   | -0.7829841615 |
| C  | -4.3335598731 | 1.4923510246  | -0.299784626  |
| C  | -2.3512849759 | 2.8839522191  | -0.579330436  |
| C  | -3.0628304923 | 4.0665460247  | -0.8168907461 |
| C  | -5.0701243978 | 2.6663632406  | -0.5356210607 |
| C  | -4.8785613071 | -0.0000004398 | 0.0000000001  |
| F  | -6.4023727558 | 2.7489536556  | -0.5522119099 |
| F  | -5.2306108495 | 4.9528123709  | -0.9949246123 |
| C  | -4.4435764574 | -2.6269629186 | -2.9840641964 |
| C  | -4.3335597106 | -1.0057972265 | -1.1425219305 |
| C  | -2.351284662  | -1.9436914248 | -2.2079108815 |
| C  | -3.0628300497 | -2.7407216528 | -3.1132870512 |
| C  | -5.0701241076 | -1.797043742  | -2.0413281651 |
| F  | -6.4023724566 | -1.8527071619 | -2.1045582256 |
| F  | -5.2306103105 | -3.3380368648 | -3.7917994311 |
| C  | -6.4281242766 | -0.0000005364 | -0.0000000121 |
| N  | 3.1313612395  | 0.0000000598  | 0.000000063   |
| C  | 3.5947331218  | 1.3643965246  | -0.2740808722 |
| C  | 3.5947332703  | -0.9195591851 | -1.0445614382 |
| C  | 3.5947332221  | -0.4448370735 | 1.3186425104  |
| C  | 5.1360337724  | 1.4461484509  | -0.2905032267 |
| C  | 5.6489703531  | 0.4640009     | -1.3754492881 |
| C  | 5.1360338788  | -0.4714907058 | 1.3976528676  |
| C  | 5.6489703029  | 0.959173972   | 1.0895611473  |
| C  | 5.6489704578  | -1.4231742216 | 0.2858883892  |
| C  | 5.1360339298  | -0.9746571906 | -1.1071494046 |
| C  | 5.6844525112  | -1.8980714934 | -2.1560900145 |
| C  | 5.6844522047  | 2.8162648725  | -0.5657331892 |
| C  | -0.1011936602 | 6.4676034969  | -1.2992168404 |
| C  | -0.1011929563 | -4.3589567826 | -4.9515005761 |
| C  | 1.1024796404  | 6.6762776289  | -1.3411354258 |
| C  | 5.0066032024  | 3.9527882721  | -0.7940388423 |
| C  | 5.6611007047  | 5.2139586255  | -1.047383638  |
| C  | 1.102480367   | -4.499596304  | -5.1112583037 |
| C  | 5.0066036326  | -2.6640517473 | -3.0261953686 |

C 2.4468862364 6.7140148476 -1.348716078  
C 2.4468869671 -4.5250298342 -5.1401492791  
C 3.6589996628 -4.4388133711 -5.0422128754  
C 3.658998946 6.5860913242 -1.3230186838  
F -0.9981705641 -0.9582273439 2.8404978423  
C -0.1011931847 -2.1086471398 6.2507175294  
F -0.9981707802 2.9390566396 -0.5903998241  
F -0.9981704604 -1.980829889 -2.2500979264  
C 5.0489087829 -4.3137451373 -4.9001433148  
C 5.6611012722 -3.5140398963 -3.9917284922  
C 5.6844524117 -0.9181927222 2.721823453  
C 5.006603493 -1.2887359946 3.8202344441  
C 5.6611010881 -1.6999180766 5.039112379  
C 5.0489085569 -2.0867758227 6.1858848042  
C 1.1024801312 -2.1766815252 6.4523938707  
C 2.44688673 -2.1889849622 6.4888655301  
C 3.6589994302 -2.147277675 6.3652317608  
C 5.0489080863 6.4005214981 -1.2857412551  
C -1.3297825058 -1.9332446859 5.730767207  
C -2.3293093897 -1.7109487233 5.0718092738  
C -1.3297822964 -3.9963679449 -4.539622382  
C -1.3297829418 5.9296119755 -1.191144741  
C -2.3293092044 -3.5368417164 -4.0176294226  
C -2.3293097756 5.2477895974 -1.0541797909  
H 3.1863842268 2.0277867989 0.491250519  
H 6.7430475761 0.4709963501 -1.3961858729  
H 5.3097020278 0.795955709 -2.3594716828  
H 3.1863843265 0.2302200393 2.0737032288  
H 3.186384435 -1.4393286787 1.5104896622  
H 3.1863844096 -0.5884579305 -2.0017399908  
H 3.1863844829 -1.9109895459 -0.8374751715  
H 5.3097022073 -2.4413400473 0.4904182668  
H 6.7430476823 -1.444630261 0.2901985162  
H 6.7430475251 0.973634766 1.105987631  
H 5.3097019416 1.6453849252 1.8690536564  
H 6.7724338631 2.8665708243 -0.5758386629  
H 6.7724341751 -1.9319759718 -2.1946034383  
H 3.186384262 1.6807696963 -1.236227867  
H 3.9230726995 -2.6667558489 -3.0292669897  
H 5.6631940344 -4.904184587 -5.5708454362  
H 6.7455692385 -3.5098912027 -3.9870159055  
H 6.7724340739 -0.934593992 2.7704423761  
H 3.9230725598 -1.2900441397 3.8241120041  
H 6.7455690546 -1.6979111095 5.0331632829  
H 5.6631937774 -2.3724011202 7.0325714682  
H 3.9230722689 3.9568003161 -0.7948448067



|   |               |              |               |
|---|---------------|--------------|---------------|
| H | 6.7455686717  | 5.2078031678 | -1.0461471031 |
| H | 5.6631932424  | 7.2765863602 | -1.4617257832 |
| F | -6.9168442111 | 0.398988431  | -1.1827335462 |
| F | -6.9168441211 | -1.223772349 | 0.2458321412  |
| F | -6.9168442543 | 0.8247822173 | 0.9369013572  |

**crypt\_AIH\_HN**

|    |               |               |               |
|----|---------------|---------------|---------------|
| Al | -1.5799812049 | -0.0000002337 | 0.0000000259  |
| C  | -2.6302546344 | 1.6333625903  | -0.3281110964 |
| C  | -2.6302545143 | -0.532529184  | 1.5785893306  |
| C  | -2.6302544567 | -1.100834304  | -1.2504781813 |
| C  | -4.1795971509 | -1.2617057228 | 3.7401061331  |
| C  | -2.081014783  | -0.9308964096 | 2.7594798309  |
| C  | -4.0355440009 | -0.4799025161 | 1.4225864505  |
| C  | -4.7882705143 | -0.8600296497 | 2.549407118   |
| C  | -2.8017132808 | -1.3155832508 | 3.8998169652  |
| F  | -6.1243176678 | -0.8860478097 | 2.6265331734  |
| F  | -4.9686287556 | -1.606486544  | 4.7621487948  |
| C  | -4.1795974355 | 3.869879187   | -0.7773841931 |
| C  | -4.0355441092 | 1.4719466773  | -0.2956857801 |
| C  | -2.081014993  | 2.8552274231  | -0.5735601731 |
| C  | -2.8017135776 | 4.0351317084  | -0.8105802106 |
| C  | -4.7882707083 | 2.6378655023  | -0.5298964089 |
| C  | -4.5892024535 | -0.0000004214 | 0.0000000023  |
| F  | -6.1243178677 | 2.7176675897  | -0.5459271369 |
| F  | -4.968629118  | 4.9273844379  | -0.9898166258 |
| C  | -4.1795970144 | -2.6081746517 | -2.9627219235 |
| C  | -4.035543949  | -0.9920453217 | -1.1269006506 |
| C  | -2.0810146823 | -1.9243318085 | -2.1859195921 |
| C  | -2.8017131385 | -2.7195493874 | -3.0892367058 |
| C  | -4.7882704213 | -1.777837154  | -2.0195107069 |
| F  | -6.124317572  | -1.8316213313 | -2.0806060657 |
| F  | -4.9686285819 | -3.320899229  | -3.772332171  |
| C  | -6.1395650433 | -0.0000005181 | -0.0000000099 |
| N  | 2.7639621578  | 0.0000000371  | 0.0000000599  |
| C  | 3.2242119868  | 1.4156833918  | -0.2843834229 |
| C  | 3.2242121408  | -0.9541249208 | -1.0838259173 |
| C  | 3.2242120909  | -0.4615582735 | 1.3682095307  |
| C  | 4.7559252502  | 1.4509642416  | -0.2914706343 |
| C  | 5.2519955754  | 0.4641668333  | -1.3759412448 |
| C  | 4.7559253569  | -0.4730608397 | 1.4023071838  |
| C  | 5.2519955252  | 0.9595170126  | 1.0899508442  |
| C  | 5.2519956801  | -1.4236832691 | 0.2859906388  |
| C  | 4.755925408   | -0.9779029179 | -1.1108363231 |
| C  | 5.3622656792  | -1.8876404016 | -2.1442409302 |

|   |               |               |               |
|---|---------------|---------------|---------------|
| C | 5.3622653744  | 2.8007876864  | -0.562624128  |
| C | 0.0082890175  | 6.6258784281  | -1.3310112209 |
| C | 0.0082897384  | -4.4656289793 | -5.0726734898 |
| C | 1.1971710726  | 6.9012761477  | -1.3863332891 |
| C | 4.7903341566  | 3.98984492    | -0.8014828134 |
| C | 5.5829966752  | 5.1770321842  | -1.0399658302 |
| C | 1.1971718234  | -4.6512380524 | -5.283513799  |
| C | 4.7903345907  | -2.6890267574 | -3.054565396  |
| C | 2.5411760801  | 6.9237083733  | -1.3908394633 |
| C | 2.5411768334  | -4.6663565099 | -5.3006875007 |
| C | 3.7451923165  | -4.5441872378 | -5.1619109665 |
| C | 3.7451915829  | 6.742439854   | -1.354426088  |
| F | -0.7213766547 | -0.96447129   | 2.8590069898  |
| C | 0.0082895048  | -2.1602498529 | 6.4036848256  |
| F | -0.7213768722 | 2.9582080292  | -0.5942469637 |
| F | -0.7213765503 | -1.9937372798 | -2.2647599283 |
| C | 5.1072069353  | -4.3275288505 | -4.9158007498 |
| C | 5.5829972385  | -3.4891526717 | -3.9634581653 |
| C | 5.3622655804  | -0.9131466874 | 2.7068652989  |
| C | 4.79033445    | -1.3008176721 | 3.8560484366  |
| C | 5.5829970559  | -1.6878788738 | 5.0034242414  |
| C | 5.1072067089  | -2.0934436969 | 6.2056505711  |
| C | 1.1971715801  | -2.2500382771 | 6.6698472309  |
| C | 2.5411765893  | -2.2573517936 | 6.6915271384  |
| C | 3.7451920788  | -2.1982523212 | 6.5163372572  |
| C | 5.1072062367  | 6.4209730972  | -1.2898495866 |
| C | -1.1815721789 | -1.9603829109 | 5.8112137886  |
| C | -2.0992923719 | -1.7052980102 | 5.0550587632  |
| C | -1.1815719669 | -4.0524676005 | -4.6033480719 |
| C | -1.1815726211 | 6.0128498848  | -1.2078656297 |
| C | -2.0992921875 | -3.5251606818 | -4.0043605163 |
| C | -2.0992927566 | 5.2304578936  | -1.0506981815 |
| H | 2.7950838331  | 2.0504006441  | 0.4890489042  |
| H | 6.3432771395  | 0.4711032869  | -1.3965029457 |
| H | 4.9156562543  | 0.7961879067  | -2.3601600687 |
| H | 2.7950839343  | 0.2251693568  | 2.0958555398  |
| H | 2.7950840431  | -1.4487289862 | 1.53117465    |
| H | 2.7950840181  | -0.6016715408 | -2.0202233739 |
| H | 2.7950840917  | -1.9276487078 | -0.8529253304 |
| H | 4.9156564339  | -2.4420523394 | 0.4905613444  |
| H | 6.3432772458  | -1.4449583565 | 0.2902644159  |
| H | 6.3432770886  | 0.9738558506  | 1.1062387936  |
| H | 4.9156561682  | 1.6458649466  | 1.8695989545  |
| H | 6.4495231109  | 2.7664412526  | -0.5557245695 |
| H | 6.4495234119  | -1.8644918975 | -2.1179457538 |
| H | 2.7950838684  | 1.7024794683  | -1.242930029  |

|   |               |               |               |
|---|---------------|---------------|---------------|
| H | 3.711917277   | -2.766353258  | -3.1424033697 |
| H | 5.8183380093  | -4.8684971107 | -5.5303067172 |
| H | 6.6594642928  | -3.4040418405 | -3.8667776815 |
| H | 6.4495233144  | -0.9019485544 | 2.6736705896  |
| H | 3.7119171322  | -1.338224432  | 3.9669340665  |
| H | 6.6594641147  | -1.6467064409 | 4.8813759283  |
| H | 5.8183377546  | -2.3551372836 | 6.9813958576  |
| H | 3.7119168304  | 4.1045779788  | -0.8245304948 |
| H | 6.6594637432  | 5.0507491215  | -1.0145979756 |
| H | 5.8183372234  | 7.2236350771  | -1.4510888889 |
| F | -6.6356585636 | 0.3988103866  | -1.1822057097 |
| F | -6.6356584736 | -1.223226182  | 0.2457224327  |
| F | -6.6356586067 | 0.8244141484  | 0.9364832358  |
| H | 0.0474582793  | -0.0000001323 | 0.0000000386  |
| H | 1.7198328035  | -0.000000028  | 0.0000000517  |

### **Crypt\_Ga\_N**

|    |               |               |               |
|----|---------------|---------------|---------------|
| Ga | -2.0888979155 | -0.0000002658 | 0.000000022   |
| C  | -2.9271181563 | 1.6977407931  | -0.341043442  |
| C  | -2.9271180315 | -0.5535185757 | 1.6408086754  |
| C  | -2.9271179715 | -1.1442231715 | -1.2997651872 |
| C  | -4.444430782  | -1.2724659859 | 3.7720030099  |
| C  | -2.3440351641 | -0.9450982296 | 2.8015786056  |
| C  | -4.3260384054 | -0.4877871357 | 1.4459589776  |
| C  | -5.0662829681 | -0.870587524  | 2.5807040459  |
| C  | -3.0639857104 | -1.3291523956 | 3.9400402841  |
| F  | -6.3986055172 | -0.8958399816 | 2.6555603104  |
| F  | -5.235186556  | -1.6157392246 | 4.7895767046  |
| C  | -4.4444310689 | 3.9028828006  | -0.7840139879 |
| C  | -4.3260385154 | 1.4961301635  | -0.300543782  |
| C  | -2.3440353772 | 2.8987869181  | -0.5823104409 |
| C  | -3.0639860102 | 4.0767506735  | -0.8189406633 |
| C  | -5.0662831645 | 2.6702483494  | -0.5364015041 |
| C  | -4.8652573788 | -0.0000004389 | 0.0000000002  |
| F  | -6.3986057193 | 2.7477018893  | -0.5519604541 |
| F  | -5.2351869204 | 4.9557640212  | -0.9955175421 |
| C  | -4.4444306441 | -2.6304180528 | -2.9879890115 |
| C  | -4.3260383525 | -1.0083442437 | -1.1454151824 |
| C  | -2.3440350617 | -1.9536895336 | -2.2192681047 |
| C  | -3.0639855665 | -2.7475992577 | -3.1210995778 |
| C  | -5.0662828738 | -1.7996621799 | -2.0443025461 |
| F  | -6.3986054202 | -1.8518635114 | -2.1035998919 |
| F  | -5.235186381  | -3.3400261826 | -3.7940591707 |
| C  | -6.4152593428 | -0.0000005356 | -0.000000012  |
| N  | 3.1306086679  | 0.0000000597  | 0.000000063   |
| C  | 3.5934415377  | 1.3642743926  | -0.2740563383 |

C 3.5934416862 -0.9194768722 -1.0444679359  
C 3.593441638 -0.4447972546 1.3185244742  
C 5.1347099354 1.4461275628 -0.2904990307  
C 5.6478067827 0.4640228623 -1.3755143915  
C 5.1347100417 -0.4714838958 1.3976326801  
C 5.6478067324 0.959219372 1.089612719  
C 5.6478068873 -1.4232415841 0.285901921  
C 5.1347100928 -0.9746431129 -1.1071334131  
C 5.6825774141 -1.8981785159 -2.1562115852  
C 5.6825771075 2.8164236669 -0.565765088  
C -0.1045152062 6.4769725447 -1.3010989015  
C -0.1045145013 -4.3652712195 -4.9586733792  
C 1.0998751395 6.6820686574 -1.3422987318  
C 5.0039021652 3.9525346189 -0.7939878883  
C 5.6579624579 5.213810566 -1.0473538958  
C 1.0998758668 -4.503499271 -5.1156918286  
C 5.0039025954 -2.6638807935 -3.0260011756  
C 2.4442553977 6.7164319618 -1.3492016297  
C 2.4442561286 -4.5266588916 -5.1419997857  
C 3.6562341218 -4.4393616046 -5.042835634  
C 3.6562334049 6.5869047654 -1.3231820885  
F -0.9948007177 -0.9639944785 2.8575935111  
C -0.10451473 -2.1117017513 6.2597723934  
F -0.9948009351 2.9567454907 -0.5939531732  
F -0.9948006133 -1.9927516048 -2.2636402461  
C 5.0459632336 -4.3137752794 -4.9001775542  
C 5.6579630254 -3.5139401093 -3.9916151402  
C 5.6825773146 -0.9182444944 2.7219769225  
C 5.0039024559 -1.2886532957 3.8199892972  
C 5.6579628413 -1.6998698047 5.0389692847  
C 5.0459630076 -2.0867904041 6.1859280276  
C 1.0998756308 -2.1785695871 6.4579907016  
C 2.4442558915 -2.1897730194 6.4912015883  
C 3.6562338892 -2.1475428833 6.366017924  
C 5.045962537 6.4005662211 -1.2857502392  
C -1.3339008143 -1.93694688 5.7417417171  
C -2.3345072927 -1.7150763097 5.0840447851  
C -1.3339006045 -4.0040210528 -4.5483158311  
C -1.3339012511 5.9409672767 -1.1934258022  
C -2.334507107 -3.5453741873 -4.0273217726  
C -2.3345076795 5.2604496537 -1.0567229523  
H 3.1848669384 2.0274744393 0.4912858142  
H 6.7419153767 0.4710068207 -1.3962169116  
H 5.3085556592 0.7959845498 -2.3595571766  
H 3.184867038 0.2302946481 2.073397864  
H 3.1848671466 -1.4392030656 1.5102015034

|   |               |               |               |
|---|---------------|---------------|---------------|
| H | 3.1848671211  | -0.5882711844 | -2.0014871272 |
| H | 3.1848671945  | -1.9107623968 | -0.8372578759 |
| H | 5.3085558387  | -2.4414285076 | 0.4904360368  |
| H | 6.7419154829  | -1.4446623767 | 0.2902049676  |
| H | 6.7419153257  | 0.9736564109  | 1.1060122182  |
| H | 5.308555573   | 1.6454445445  | 1.8691213803  |
| H | 6.7705318808  | 2.8675393585  | -0.5760332228 |
| H | 6.7705321929  | -1.9326287328 | -2.1953449336 |
| H | 3.1848669736  | 1.680467938   | -1.2361397977 |
| H | 3.9203936118  | -2.6661362443 | -3.0285631576 |
| H | 5.6606403294  | -4.9040212867 | -5.5706599372 |
| H | 6.7424411882  | -3.5098943591 | -3.9870194908 |
| H | 6.7705320916  | -0.9349097654 | 2.7713784313  |
| H | 3.9203934721  | -1.2897444058 | 3.8232234945  |
| H | 6.7424410043  | -1.6979126365 | 5.0331678089  |
| H | 5.6606400724  | -2.3723221237 | 7.0323372963  |
| H | 3.9203931812  | 3.955880977   | -0.7946601292 |
| H | 6.7424406214  | 5.2078078506  | -1.0461480439 |
| H | 5.6606395375  | 7.2763440629  | -1.4616771104 |
| F | -6.9036039322 | 0.3989587611  | -1.1826455923 |
| F | -6.9036038422 | -1.2236813425 | 0.24581386    |
| F | -6.9036039754 | 0.8247208833  | 0.9368316847  |

### **Crypt\_GaH\_HN**

|    |               |               |               |
|----|---------------|---------------|---------------|
| Ga | -1.5661630655 | -0.0000002329 | 0.000000026   |
| C  | -2.6451249385 | 1.6417798273  | -0.3298019573 |
| C  | -2.6451248177 | -0.5352734755 | 1.5867243028  |
| C  | -2.6451247598 | -1.1065072523 | -1.2569222929 |
| C  | -4.1931091933 | -1.2623222402 | 3.7419336893  |
| C  | -2.0905555355 | -0.9327713574 | 2.765037786   |
| C  | -4.0459349878 | -0.4802767482 | 1.4236957944  |
| C  | -4.8001910189 | -0.8606866486 | 2.5513546747  |
| C  | -2.8148513943 | -1.316662388  | 3.9030158773  |
| F  | -6.1362904162 | -0.8860495651 | 2.6265383746  |
| F  | -4.9829506114 | -1.6070679903 | 4.7638723885  |
| C  | -4.1931094781 | 3.8717701547  | -0.7777640523 |
| C  | -4.0459350961 | 1.4730945123  | -0.2959163582 |
| C  | -2.0905557459 | 2.8609782265  | -0.5747153988 |
| C  | -2.8148516913 | 4.038441615   | -0.8112451073 |
| C  | -4.800191213  | 2.6398806343  | -0.5303012103 |
| C  | -4.5964387307 | -0.0000004218 | 0.0000000022  |
| F  | -6.1362906161 | 2.7176729707  | -0.5459282181 |
| F  | -4.9829509739 | 4.9291678358  | -0.9901748764 |
| C  | -4.1931090568 | -2.6094491045 | -2.9641696208 |
| C  | -4.0459349358 | -0.9928189267 | -1.1277794165 |
| C  | -2.0905554346 | -1.9282076658 | -2.1903223216 |

|   |               |               |               |
|---|---------------|---------------|---------------|
| C | -2.8148512519 | -2.7217801592 | -3.0917707215 |
| C | -4.8001909258 | -1.7791952893 | -2.0210534625 |
| F | -6.1362903204 | -1.8316249591 | -2.0806101859 |
| F | -4.9829504376 | -3.3221011832 | -3.7736975145 |
| C | -6.1469222014 | -0.0000005185 | -0.0000000099 |
| N | 2.7825842128  | 0.0000000383  | 0.000000006   |
| C | 3.2424805228  | 1.4162900575  | -0.28450529   |
| C | 3.2424806768  | -0.9545337921 | -1.0842903705 |
| C | 3.2424806269  | -0.4617560645 | 1.3687958514  |
| C | 4.7739766622  | 1.4510652852  | -0.2914909316 |
| C | 5.2699837239  | 0.4642073375  | -1.376061309  |
| C | 4.7739767689  | -0.4730937816 | 1.4024048381  |
| C | 5.2699836737  | 0.959600741   | 1.0900459531  |
| C | 5.2699838286  | -1.4238074982 | 0.2860155944  |
| C | 4.77397682    | -0.9779710162 | -1.1109136796 |
| C | 5.3773157668  | -1.8886188424 | -2.1453523784 |
| C | 5.3773154619  | 2.8022394507  | -0.5629157592 |
| C | 0.000527631   | 6.6213218732  | -1.3300958971 |
| C | 0.0005283514  | -4.4625580088 | -5.06918506   |
| C | 1.1903118958  | 6.8932333647  | -1.3847176491 |
| C | 4.8002463385  | 3.9889552517  | -0.801304096  |
| C | 5.5861182208  | 5.1803073943  | -1.0406237567 |
| C | 1.1903126458  | -4.6458174762 | -5.277356365  |
| C | 4.8002467725  | -2.6884271486 | -3.0538842787 |
| C | 2.5343329684  | 6.9147388282  | -1.3890376548 |
| C | 2.5343337207  | -4.660311326  | -5.2938205515 |
| C | 3.7388154739  | -4.5398826261 | -5.1570211979 |
| C | 3.738814741   | 6.7360528837  | -1.353143069  |
| F | -0.7333722565 | -0.9666496111 | 2.8654642419  |
| C | 0.0005281179  | -2.15876427   | 6.3992810718  |
| F | -0.7333724745 | 2.9648893331  | -0.5955891091 |
| F | -0.7333721519 | -1.9982402648 | -2.2698750353 |
| C | 5.1024926724  | -4.3278022629 | -4.9161113288 |
| C | 5.5861187844  | -3.4913600575 | -3.965965617  |
| C | 5.377315668   | -0.913620008  | 2.7082683786  |
| C | 4.8002466319  | -1.3005276108 | 3.8551886021  |
| C | 5.5861186017  | -1.6889466974 | 5.0065896196  |
| C | 5.102492446   | -2.0935759604 | 6.2060426423  |
| C | 1.1903124028  | -2.2474160714 | 6.6620741568  |
| C | 2.5343334769  | -2.2544274337 | 6.6828583805  |
| C | 3.7388152363  | -2.1961699638 | 6.5101644695  |
| C | 5.1024919737  | 6.4213787721  | -1.289931079  |
| C | -1.1919045174 | -1.9605124795 | 5.81159787    |
| C | -2.1125893389 | -1.7064703203 | 5.0585338702  |
| C | -1.1919043054 | -4.0527354416 | -4.6036523219 |
| C | -1.1919049596 | 6.0132472924  | -1.2079454615 |

|   |               |               |               |
|---|---------------|---------------|---------------|
| C | -2.1125891543 | -3.527584059  | -4.0071133196 |
| C | -2.1125897238 | 5.2340535784  | -1.0514204856 |
| H | 2.8132758716  | 2.0506375349  | 0.4891922322  |
| H | 6.361241334   | 0.4711320758  | -1.3965882818 |
| H | 4.9336948125  | 0.7962327584  | -2.3602930204 |
| H | 2.8132759728  | 0.2252814983  | 2.0961086882  |
| H | 2.8132760816  | -1.4489715553 | 1.5313081386  |
| H | 2.8132760566  | -0.6016658589 | -2.02050019   |
| H | 2.8132761302  | -1.9279240097 | -0.852954788  |
| H | 4.9336949921  | -2.4421899031 | 0.4905889787  |
| H | 6.3612414403  | -1.4450466527 | 0.2902821532  |
| H | 6.3612412831  | 0.9739153612  | 1.1063063928  |
| H | 4.9336947264  | 1.645957662   | 1.8697042723  |
| H | 6.4646382898  | 2.7713081449  | -0.556702234  |
| H | 6.4646385913  | -1.8677720246 | -2.1216717729 |
| H | 2.8132759068  | 1.7026426321  | -1.2431537194 |
| H | 3.7212631254  | -2.7624673887 | -3.1379892672 |
| H | 5.8089224187  | -4.8714839424 | -5.5336995695 |
| H | 6.6633200229  | -3.4105057691 | -3.8741202981 |
| H | 6.4646384936  | -0.9035353167 | 2.6783742735  |
| H | 3.7212629808  | -1.3363446409 | 3.9613617542  |
| H | 6.6633198444  | -1.6498333688 | 4.8906451632  |
| H | 5.8089221638  | -2.3565821649 | 6.9856789551  |
| H | 3.7212626794  | 4.0988123201  | -0.823372285  |
| H | 6.6633194723  | 5.0603399787  | -1.0165245939 |
| H | 5.8089216322  | 7.2280667883  | -1.4519791345 |
| F | -6.6428547814 | 0.3988075924  | -1.1821974281 |
| F | -6.6428546915 | -1.2232176134 | 0.2457207113  |
| F | -6.6428548246 | 0.8244083727  | 0.9364766754  |
| H | 0.028976077   | -0.0000001334 | 0.0000000385  |
| H | 1.7420654841  | -0.0000000266 | 0.0000000519  |

### **Crypt\_B\_P**

|   |               |               |               |
|---|---------------|---------------|---------------|
| B | -2.6572245989 | -0.0000003012 | 0.0000000175  |
| C | -3.0753073523 | 1.4536743462  | -0.2920152013 |
| C | -3.0753072454 | -0.4739450691 | 1.4049268181  |
| C | -3.0753071941 | -0.979730259  | -1.112911574  |
| C | -4.3662003211 | -1.2446274294 | 3.6894804632  |
| C | -2.3634271316 | -0.8449351225 | 2.5046624817  |
| C | -4.4904949196 | -0.4683445653 | 1.3883248255  |
| C | -5.1161227444 | -0.8667079983 | 2.5692038567  |
| C | -2.9726476193 | -1.2497750216 | 3.7047398743  |
| F | -6.4397861594 | -0.9201443324 | 2.7276063256  |
| F | -5.0316283043 | -1.613884393  | 4.7840784178  |
| C | -4.3662006018 | 3.8174969073  | -0.7668616066 |
| C | -4.4904950253 | 1.4364962242  | -0.2885644767 |

|   |               |               |               |
|---|---------------|---------------|---------------|
| C | -2.3634273222 | 2.5915684568  | -0.5205961755 |
| C | -2.9726479011 | 3.833285862   | -0.7700332747 |
| C | -5.1161229398 | 2.6583491262  | -0.5340111806 |
| C | -5.0980038924 | -0.0000004535 | -0.0000000016 |
| F | -6.4397863669 | 2.8222477405  | -0.5669352793 |
| F | -5.0316286683 | 4.950074967   | -0.9943747166 |
| C | -4.3662001863 | -2.5728707014 | -2.9226188444 |
| C | -4.4904948689 | -0.9681529056 | -1.0997603395 |
| C | -2.3634270401 | -1.746634183  | -1.9840662467 |
| C | -2.9726474839 | -2.5835118031 | -2.9347065544 |
| C | -5.1161226505 | -1.7916424917 | -2.0351926815 |
| F | -6.4397860597 | -1.9021050195 | -2.1606710829 |
| F | -5.0316281295 | -3.336191922  | -3.7897037046 |
| C | -6.638763051  | -0.0000005495 | -0.0000000138 |
| P | 2.5620634386  | 0.0000000243  | 0.0000000586  |
| C | 3.4688878593  | 1.5868667367  | -0.3187708513 |
| C | 3.468888032   | -1.0694969592 | -1.2148813123 |
| C | 3.4688879759  | -0.517369535  | 1.5336523606  |
| C | 5.0026246305  | 1.4704636187  | -0.2953876778 |
| C | 5.477898958   | 0.4647669719  | -1.3777202079 |
| C | 5.0026247386  | -0.4794182444 | 1.4211526518  |
| C | 5.4778989076  | 0.9607575932  | 1.0913600522  |
| C | 5.4778990628  | -1.4255239467 | 0.2863604002  |
| C | 5.0026247906  | -0.9910448449 | -1.1257647408 |
| C | 5.678758662   | -1.8837032566 | -2.1397686008 |
| C | 5.6787583579  | 2.7949459947  | -0.5614506378 |
| C | 0.0633818032  | 6.2138250451  | -1.2482376388 |
| C | 0.0633824795  | -4.1879182588 | -4.7572115799 |
| C | 1.2488214448  | 6.5055193451  | -1.3068333757 |
| C | 5.0843289491  | 3.9742684648  | -0.7983537973 |
| C | 5.7914913267  | 5.2063303882  | -1.0458512696 |
| C | 1.2488221528  | -4.3845107026 | -4.9805283073 |
| C | 5.0843293816  | -2.6785286976 | -3.0426402785 |
| C | 2.587572128   | 6.6341342785  | -1.3326696089 |
| C | 2.58757285    | -4.4711928875 | -5.0789939023 |
| C | 3.805306441   | -4.4327309075 | -5.0353035886 |
| C | 3.8053057252  | 6.5770664891  | -1.3212057655 |
| F | -1.022117719  | -0.8227877987 | 2.4390108485  |
| C | 0.0633822601  | -2.025907181  | 6.0054493354  |
| F | -1.0221179046 | 2.5236389291  | -0.5069504157 |
| F | -1.0221176299 | -1.7008517281 | -1.9320603417 |
| C | 5.1977382157  | -4.315631448  | -4.9022860545 |
| C | 5.7914918933  | -3.5088986963 | -3.9858884205 |
| C | 5.6787585634  | -0.9112420821 | 2.7012194877  |
| C | 5.0843292413  | -1.2957392225 | 3.8409943109  |
| C | 5.7914917095  | -1.6974310148 | 5.0317399419  |



C 5.1977379896 -2.0876883215 6.1885897769  
C 1.2488219231 -2.1210088153 6.2873618278  
C 2.5875726158 -2.1629413134 6.4116636874  
C 3.8053062087 -2.1443352762 6.356509559  
C 5.1977375188 6.4033203355 -1.2863034846  
C -1.1448664765 -1.8364178754 5.4437409939  
C -2.143208635 -1.6140556852 4.7845867406  
C -1.1448662776 -3.7962093395 -4.3122548057  
C -1.1448668906 5.6326265942 -1.1314860999  
C -2.1432084602 -3.3365462064 -3.7901063313  
C -2.143208999 4.9506010841 -0.9944803445  
H 3.129081041 2.3074227469 0.4285723918  
H 6.5713771169 0.4767196271 -1.413151566  
H 5.130385634 0.7958044082 -2.3590232127  
H 3.1290811616 0.1325975383 2.3431371924  
H 3.1290812694 -1.5248658081 1.784000563  
H 3.1290812545 -0.7825567599 -2.2125727658  
H 3.1290813273 -2.0955149583 -1.0567357167  
H 5.1303858135 -2.4408760259 0.4903250502  
H 6.5713772244 -1.4621846357 0.2937248481  
H 6.5713770653 0.9854658315 1.1194269881  
H 5.1303855478 1.645072171 1.8686983987  
H 6.7668957085 2.7582974889 -0.5540886374  
H 6.7668960087 -1.85900323 -2.1117109924  
H 3.129081076 1.9629175989 -1.2864012867  
H 4.0039852582 -2.7218100736 -3.0918051317  
H 5.8158923652 -4.9038149029 -5.570425508  
H 6.8752339396 -3.4865372147 -3.960487252  
H 6.7668959113 -0.8992933994 2.6657999046  
H 4.0039851156 -1.31667664 3.9030594375  
H 6.875233757 -1.6866136044 4.9996738178  
H 5.8158921083 -2.3722222804 7.0320413584  
H 4.0039848187 4.0384870562 -0.8112540962  
H 6.8752333766 5.1731516989 -1.0391862885  
H 5.8158915733 7.276037865 -1.461615598  
F -7.1236896922 0.3994655677 -1.1841479748  
F -7.1236896022 -1.2252358663 0.2461261294  
F -7.1236897355 0.8257685593 0.9380217927

### **Crypt\_BH\_HP**

5 1.928382 0.000111 -0.000186  
6 2.617488 1.40559 -0.374768  
6 2.619663 -1.026665 -1.029081  
6 2.617819 -0.377117 1.404501  
6 3.973719 -2.736374 -2.743462  
6 1.952089 -1.870031 -1.874186

|    |           |           |           |
|----|-----------|-----------|-----------|
| 6  | 4.029187  | -1.023086 | -1.026013 |
| 6  | 4.69001   | -1.89273  | -1.897975 |
| 6  | 2.582278  | -2.757647 | -2.764233 |
| 9  | 6.020168  | -1.998142 | -2.003978 |
| 9  | 4.654939  | -3.549185 | -3.558282 |
| 6  | 3.967679  | 3.747614  | -0.996932 |
| 6  | 4.027027  | 1.403359  | -0.373022 |
| 6  | 1.948026  | 2.558191  | -0.682054 |
| 6  | 2.576184  | 3.774049  | -1.00502  |
| 6  | 4.685846  | 2.594601  | -0.689539 |
| 6  | 4.635804  | 0.002118  | 0.001315  |
| 9  | 6.015736  | 2.741547  | -0.7273   |
| 9  | 4.64714   | 4.860969  | -1.292634 |
| 6  | 3.968602  | -1.007537 | 3.743986  |
| 6  | 4.027367  | -0.375458 | 1.40198   |
| 6  | 1.948613  | -0.688163 | 2.556277  |
| 6  | 2.577114  | -1.015409 | 3.770789  |
| 6  | 4.686521  | -0.696383 | 2.591855  |
| 9  | 6.016455  | -0.73549  | 2.738113  |
| 9  | 4.64829   | -1.307377 | 4.856091  |
| 6  | 6.177025  | 0.003311  | 0.001905  |
| 15 | -2.650015 | 0.00181   | 0.000993  |
| 6  | -3.363902 | 1.605276  | -0.435628 |
| 6  | -3.364213 | -0.424308 | 1.607212  |
| 6  | -3.359985 | -1.179026 | -1.171005 |
| 6  | -4.909234 | 1.458301  | -0.397623 |
| 6  | -5.365037 | 1.032657  | 1.025063  |
| 6  | -4.905749 | -1.072835 | -1.067107 |
| 6  | -5.361075 | 0.371581  | -1.411653 |
| 6  | -5.362189 | -1.407463 | 0.379371  |
| 6  | -4.90956  | -0.387126 | 1.459808  |
| 6  | -5.620044 | -0.729698 | 2.746486  |
| 6  | -5.61986  | 2.743579  | -0.74558  |
| 6  | -0.326566 | 6.27789   | -1.673205 |
| 6  | -0.325926 | -1.690942 | 6.272175  |
| 6  | -1.499043 | 6.609652  | -1.763537 |
| 6  | -5.101564 | 3.937661  | -1.063501 |
| 6  | -5.911319 | 5.094497  | -1.373701 |
| 6  | -1.498489 | -1.779747 | 6.604072  |
| 6  | -5.101514 | -1.049951 | 3.93985   |
| 6  | -2.839642 | 6.709704  | -1.793467 |
| 6  | -2.83911  | -1.805039 | 6.705256  |
| 6  | -4.052556 | -1.774018 | 6.600366  |
| 6  | -4.053089 | 6.603235  | -1.76877  |
| 9  | 0.594529  | -1.872311 | -1.876105 |
| 6  | -0.317515 | -4.591484 | -4.59947  |

|   |           |           |           |
|---|-----------|-----------|-----------|
| 9 | 0.590423  | 2.558736  | -0.682739 |
| 9 | 0.591055  | -0.689761 | 2.55698   |
| 6 | -5.423583 | -1.694363 | 6.317457  |
| 6 | -5.911037 | -1.36206  | 5.096367  |
| 6 | -5.613738 | -2.017784 | -2.007365 |
| 6 | -5.09376  | -2.890501 | -2.881152 |
| 6 | -5.902636 | -3.73858  | -3.727819 |
| 6 | -5.4149   | -4.631696 | -4.624198 |
| 6 | -1.489843 | -4.835875 | -4.842039 |
| 6 | -2.83042  | -4.911687 | -4.914171 |
| 6 | -4.043852 | -4.836605 | -4.834562 |
| 6 | -5.424068 | 6.318017  | -1.697217 |
| 6 | 0.860839  | -4.133857 | -4.142178 |
| 6 | 1.7892    | -3.578714 | -3.586599 |
| 6 | 0.853113  | -1.522593 | 5.648783  |
| 6 | 0.852279  | 5.653844  | -1.505993 |
| 6 | 1.782499  | -1.318019 | 4.891731  |
| 6 | 1.781468  | 4.89594   | -1.303745 |
| 1 | -3.007899 | 1.893538  | -1.425805 |
| 1 | -6.455879 | 1.060557  | 1.052745  |
| 1 | -5.020591 | 1.76771   | 1.755407  |
| 1 | -3.003349 | -0.940485 | -2.174062 |
| 1 | -3.004536 | -2.180459 | -0.92387  |
| 1 | -3.010581 | 0.289092  | 2.353088  |
| 1 | -3.008454 | -1.412831 | 1.901309  |
| 1 | -5.016128 | -2.406812 | 0.650991  |
| 1 | -6.453011 | -1.447242 | 0.388635  |
| 1 | -6.451778 | 0.381139  | -1.453149 |
| 1 | -5.013341 | 0.636901  | -2.412151 |
| 1 | -6.703053 | 2.649067  | -0.722456 |
| 1 | -6.703253 | -0.705575 | 2.652548  |
| 1 | -3.009766 | 2.354701  | 0.273683  |
| 1 | -4.02788  | -1.088973 | 4.084132  |
| 1 | -6.120799 | -1.910938 | 7.11878   |
| 1 | -6.987218 | -1.32731  | 4.972172  |
| 1 | -6.697111 | -1.951147 | -1.939146 |
| 1 | -4.019988 | -2.993992 | -2.987743 |
| 1 | -6.978861 | -3.649431 | -3.635141 |
| 1 | -6.111964 | -5.219363 | -5.210621 |
| 1 | -4.027943 | 4.082928  | -1.099595 |
| 1 | -6.987471 | 4.969001  | -1.343208 |
| 1 | -6.121363 | 7.119794  | -1.911849 |
| 9 | 6.670365  | 0.885716  | 0.886152  |
| 9 | 6.67194   | -1.202996 | 0.323835  |
| 9 | 6.67125   | 0.328234  | -1.203993 |
| 1 | 0.724858  | -0.000687 | -0.000945 |

1 -1.239591 0.00308 0.002809

**Crypt\_Al\_P**

13 -0.933925 0.000731 -0.005849  
6 -1.912793 -0.521963 1.612244  
6 -1.954398 -1.115944 -1.255922  
6 -1.935235 1.656182 -0.338698  
6 -3.560167 -2.546125 -2.977786  
6 -1.441594 -1.976111 -2.177026  
6 -3.358005 -0.937822 -1.134875  
6 -4.132109 -1.653637 -2.068022  
6 -2.194244 -2.768479 -3.05684  
9 -5.462007 -1.595985 -2.195066  
9 -4.378349 -3.226611 -3.781849  
6 -3.459564 -1.312829 3.749104  
6 -3.321265 -0.520749 1.431685  
6 -1.367101 -0.883277 2.804825  
6 -2.089309 -1.251329 3.950301  
6 -4.063515 -0.984354 2.533279  
6 -3.890568 0.011418 0.037402  
9 -5.387863 -1.163258 2.566088  
9 -4.250627 -1.683269 4.757104  
6 -3.507714 3.894997 -0.674153  
6 -3.338998 1.491363 -0.21055  
6 -1.408362 2.872187 -0.647015  
6 -2.144113 4.045567 -0.871779  
6 -4.09386 2.672413 -0.340398  
9 -5.4162 2.779717 -0.176819  
9 -4.310059 4.949239 -0.82888  
6 -5.444994 0.016124 0.06866  
15 1.576004 0.001594 0.020768  
6 2.451302 0.390465 1.599827  
6 2.399687 1.193342 -1.137093  
6 2.401034 -1.583118 -0.460688  
6 3.981353 0.351191 1.425492  
6 4.435337 1.375957 0.357431  
6 3.93525 -1.450842 -0.445419  
6 4.428698 -1.057426 0.966626  
6 4.376571 -0.361818 -1.457016  
6 3.933415 1.066013 -1.077888  
6 4.675446 2.022703 -1.989215  
6 4.758448 0.653787 2.69114  
6 0.526163 -1.217037 6.786943  
6 0.422896 6.506209 -2.367435  
6 1.645088 -0.86731 7.13203  
6 4.400144 0.592823 3.981473

|   |           |           |           |
|---|-----------|-----------|-----------|
| 6 | 5.360713  | 0.842258  | 5.037601  |
| 6 | 1.534637  | 6.635685  | -2.857728 |
| 6 | 4.300531  | 3.172611  | -2.567609 |
| 6 | 2.896746  | -0.377257 | 7.149212  |
| 6 | 2.782862  | 6.406962  | -3.301845 |
| 6 | 3.86383   | 5.930807  | -3.598626 |
| 6 | 3.983807  | 0.102978  | 6.882801  |
| 9 | -0.085648 | -2.116679 | -2.239569 |
| 6 | 0.349614  | -5.297594 | -4.470867 |
| 9 | -0.007815 | -0.864854 | 2.919373  |
| 9 | -0.053279 | 2.971543  | -0.771262 |
| 6 | 5.052012  | 5.218609  | -3.80767  |
| 6 | 5.247133  | 3.964889  | -3.327639 |
| 6 | 4.673413  | -2.714437 | -0.839608 |
| 6 | 4.278251  | -3.801864 | -1.516664 |
| 6 | 5.218491  | -4.855419 | -1.843984 |
| 6 | 5.002909  | -5.897775 | -2.685217 |
| 6 | 1.461016  | -5.789221 | -4.342532 |
| 6 | 2.712651  | -6.05681  | -3.930349 |
| 6 | 3.802963  | -6.067778 | -3.387966 |
| 6 | 5.172898  | 0.632198  | 6.364559  |
| 6 | -0.733822 | -4.527454 | -4.273842 |
| 6 | -1.557824 | -3.742067 | -3.847136 |
| 6 | -0.6652   | 5.958604  | -1.800259 |
| 6 | -0.575128 | -1.420461 | 6.044559  |
| 6 | -1.496102 | 5.205831  | -1.330509 |
| 6 | -1.423309 | -1.443443 | 5.173766  |
| 1 | 2.117507  | -0.336666 | 2.339973  |
| 1 | 5.527462  | 1.389967  | 0.342638  |
| 1 | 4.117795  | 2.379974  | 0.645994  |
| 1 | 2.052439  | -2.363959 | 0.21946   |
| 1 | 2.029762  | -1.843868 | -1.450861 |
| 1 | 2.066999  | 2.191262  | -0.85531  |
| 1 | 2.014086  | 1.008853  | -2.143286 |
| 1 | 4.000328  | -0.617606 | -2.45013  |
| 1 | 5.466546  | -0.379067 | -1.525848 |
| 1 | 5.520641  | -1.087021 | 0.970903  |
| 1 | 4.095812  | -1.799441 | 1.69555   |
| 1 | 5.798221  | 0.898248  | 2.48216   |
| 1 | 5.714409  | 1.727873  | -2.124321 |
| 1 | 2.10001   | 1.365481  | 1.947945  |
| 1 | 3.289473  | 3.551438  | -2.469072 |
| 1 | 5.848472  | 5.6981    | -4.364687 |
| 1 | 6.213854  | 3.508764  | -3.511574 |
| 1 | 5.725186  | -2.672551 | -0.560867 |
| 1 | 3.256604  | -3.917736 | -1.861363 |

|   |           |           |           |
|---|-----------|-----------|-----------|
| 1 | 6.196022  | -4.787992 | -1.378462 |
| 1 | 5.795239  | -6.620299 | -2.841766 |
| 1 | 3.388909  | 0.33087   | 4.270378  |
| 1 | 6.328216  | 1.221448  | 4.727063  |
| 1 | 5.975536  | 0.866829  | 7.053882  |
| 9 | -5.914037 | 0.736097  | 1.097803  |
| 9 | -5.962911 | 0.545684  | -1.049168 |
| 9 | -5.939502 | -1.225051 | 0.1942    |

### **Crypt\_AIH\_HP**

|    |               |               |               |
|----|---------------|---------------|---------------|
| Al | -1.82166745   | -0.0000002488 | 0.000000024   |
| C  | -2.8575415989 | 1.6278479233  | -0.3270033107 |
| C  | -2.8575414792 | -0.5307312438 | 1.5732596056  |
| C  | -2.8575414218 | -1.0971176197 | -1.2462562473 |
| C  | -4.3681299988 | -1.2649539492 | 3.7497348993  |
| C  | -2.2867943655 | -0.9252781655 | 2.7428254833  |
| C  | -4.2600477788 | -0.4813530371 | 1.4268862247  |
| C  | -4.9957174574 | -0.865024744  | 2.5642141668  |
| C  | -2.9856556121 | -1.3137348896 | 3.8943377845  |
| F  | -6.3315313239 | -0.8944162338 | 2.6513398719  |
| F  | -5.1450340518 | -1.6127642381 | 4.7807578935  |
| C  | -4.3681302841 | 3.87984204    | -0.779385542  |
| C  | -4.2600478874 | 1.476395632   | -0.2965794939 |
| C  | -2.2867945742 | 2.8379951951  | -0.5700985549 |
| C  | -2.9856559084 | 4.0294624021  | -0.80944136   |
| C  | -4.9957176525 | 2.6531863119  | -0.5329740684 |
| C  | -4.8166457855 | -0.0000004356 | 0.0000000005  |
| F  | -6.3315315256 | 2.7433350148  | -0.551083232  |
| F  | -5.1450344156 | 4.9466392219  | -0.9936845443 |
| C  | -4.368129862  | -2.6148893136 | -2.9703493453 |
| C  | -4.2600477268 | -0.9950437974 | -1.1303067163 |
| C  | -2.2867942655 | -1.9127178631 | -2.1727268675 |
| C  | -2.98565547   | -2.7157284767 | -3.0848963799 |
| C  | -4.9957173638 | -1.7881629081 | -2.0312401011 |
| F  | -6.3315312271 | -1.8489203711 | -2.100256674  |
| F  | -5.1450338773 | -3.3338763519 | -3.7870733554 |
| C  | -6.3638463717 | -0.000000532  | -0.0000000116 |
| P  | 2.707886282   | 0.0000000336  | 0.0000000594  |
| C  | 3.4257837431  | 1.6204266498  | -0.325512392  |
| C  | 3.4257839194  | -1.0921152644 | -1.2405742822 |
| C  | 3.4257838623  | -0.5283111502 | 1.5660868694  |
| C  | 4.9695443469  | 1.4824926402  | -0.2978040774 |
| C  | 5.430083685   | 0.4662480927  | -1.3821107424 |
| C  | 4.969544456   | -0.4833400949 | 1.4327782904  |
| C  | 5.4300836345  | 0.9638193424  | 1.094838009   |
| C  | 5.4300837901  | -1.430066825  | 0.2872729757  |

|   |               |               |               |
|---|---------------|---------------|---------------|
| C | 4.9695445082  | -0.9991520212 | -1.1349739816 |
| C | 5.6326643262  | -1.8962736017 | -2.1540477196 |
| C | 5.6326640201  | 2.8135972423  | -0.5651973153 |
| C | -0.0191604542 | 6.4367856122  | -1.2930261204 |
| C | -0.0191597538 | -4.3381865117 | -4.9279068597 |
| C | 1.1796489292  | 6.6736005872  | -1.3405976588 |
| C | 5.0340616112  | 3.9905934343  | -0.8016331705 |
| C | 5.7337630679  | 5.2287634652  | -1.0503576441 |
| C | 1.1796496553  | -4.497792056  | -5.109208796  |
| C | 5.0340620454  | -2.6895312065 | -3.0551384338 |
| C | 2.5248397264  | 6.7209646514  | -1.3501121587 |
| C | 2.5248404576  | -4.52971377   | -5.1454699405 |
| C | 3.7392396126  | -4.4562788419 | -5.0620525568 |
| C | 3.7392388932  | 6.6120057358  | -1.3282243885 |
| F | -0.9258704062 | -0.9501437964 | 2.816535586   |
| C | -0.0191599808 | -2.0985995097 | 6.2209330944  |
| F | -0.9258706205 | 2.91426295    | -0.5854192487 |
| F | -0.9258703034 | -1.9641197325 | -2.2311162443 |
| C | 5.1291453404  | -4.3264335238 | -4.9145565289 |
| C | 5.7337636368  | -3.5240178739 | -4.0030628519 |
| C | 5.632664227   | -0.9173229926 | 2.719245282   |
| C | 5.0340619047  | -1.3010616917 | 3.8567718373  |
| C | 5.7337634524  | -1.7047449243 | 5.0534207454  |
| C | 5.1291451141  | -2.0929138314 | 6.2040798813  |
| C | 1.17964942    | -2.1758087162 | 6.4498065972  |
| C | 2.5248402206  | -2.1912508147 | 6.4955822732  |
| C | 3.7392393795  | -2.1557266001 | 6.3902771479  |
| C | 5.129144642   | 6.4193479091  | -1.2895231172 |
| C | -1.2491576252 | -1.9241736765 | 5.703877794   |
| C | -2.2341699395 | -1.6951862453 | 5.0250841678  |
| C | -1.2491574171 | -3.9776165265 | -4.5183219549 |
| C | -1.2491580592 | 5.9017895637  | -1.1855557538 |
| C | -2.2341697562 | -3.5042578167 | -3.9806161676 |
| C | -2.2341703219 | 5.1994432383  | -1.044467938  |
| H | 3.0717373685  | 2.3218502655  | 0.4312834939  |
| H | 6.5213103236  | 0.4785104129  | -1.4184600489 |
| H | 5.085322947   | 0.7974538002  | -2.3639125572 |
| H | 3.0717374898  | 0.1334577557  | 2.3577920028  |
| H | 3.0717375983  | -1.5344274563 | 1.7951396115  |
| H | 3.0717375832  | -0.7874226403 | -2.2264229185 |
| H | 3.0717376564  | -2.1086365107 | -1.06331815   |
| H | 5.0853231269  | -2.4459350217 | 0.4913413039  |
| H | 6.5213104315  | -1.4676773133 | 0.2948282199  |
| H | 6.5213102718  | 0.9891677146  | 1.1236320969  |
| H | 5.0853228608  | 1.6484817672  | 1.8725714875  |
| H | 6.7193541571  | 2.7756330014  | -0.5575710091 |

H 6.7193544591 -1.8706868121 -2.1249828042  
H 3.0717374036 1.975178924 -1.294473666  
H 3.9527676741 -2.7369014498 -3.1089479829  
H 5.7513186799 -4.9134604907 -5.5813822849  
H 6.8171619312 -3.5064088495 -3.9830601758  
H 6.7193543613 -0.9049453381 2.6825540859  
H 3.9527675309 -1.3239771004 3.9247003748  
H 6.8171617478 -1.6962265169 5.028169616  
H 5.7513184229 -2.3768883386 7.0458730663  
H 3.9527672322 4.060878884 -0.8157521843  
H 6.8171613652 5.2026362359 -1.0451091654  
H 5.7513178867 7.2903494995 -1.4644905315  
F -6.859577267 0.3989282916 -1.1825552616  
F -6.859577177 -1.2235878747 0.2457950852  
F -6.8595773101 0.8246578943 0.9367601299  
H -0.2319311976 -0.0000001497 0.0000000364  
H 1.2774612228 -0.0000000556 0.0000000482

### Crypt\_Ga\_P

Ga 0. 0.0000000263 0.8419089108  
C -1.4734117293 -0.8506746243 1.8886388885  
C 0.0000000069 1.7013493394 1.8886388885  
C 1.4734117225 -0.8506746362 1.8886388885  
C 0.0000000159 3.943847494 3.4882839515  
C 0.0000000119 2.9599897625 1.3660879315  
C 0.0000000061 1.5008455686 3.2921553247  
C 0.0000000108 2.6765417924 4.067540716  
C 0.0000000167 4.1441150377 2.1175078534  
F 0.000000011 2.7393907683 5.4021472352  
F 0.0000000202 5.0023669026 4.300344337  
C -3.4154721036 -1.9719236938 3.4882839515  
C -1.2997703698 -0.7504227396 3.2921553247  
C -2.5634263124 -1.4799948314 1.3660879315  
C -3.5889088844 -2.0720574649 2.1175078534  
C -2.3179531691 -1.3382708474 4.067540716  
C 0. 0.0000000263 3.8347203035  
F -2.372381979 -1.3696953351 5.4021472352  
F -4.332176804 -2.5011833943 4.300344337  
C 3.4154720877 -1.9719237213 3.4882839515  
C 1.2997703638 -0.7504227501 3.2921553247  
C 2.5634263005 -1.4799948521 1.3660879315  
C 3.5889088677 -2.0720574938 2.1175078534  
C 2.3179531583 -1.3382708661 4.067540716  
F 2.372381968 -1.3696953543 5.4021472352  
F 4.3321767838 -2.5011834293 4.300344337  
C 0. 0.0000000263 5.3907710831



P 0. 0.0000000263 -1.7545267002  
C -1.436833974 -0.8295564476 -2.5866164871  
C 1.4368339673 -0.8295564592 -2.5866164871  
C 0.0000000067 1.6591129858 -2.5866164871  
C -1.3030657844 -0.7523253481 -4.1249827046  
C -0.0000000059 -1.4536866904 -4.5787554862  
C 0.0000000061 1.5046507856 -4.1249827046  
C -1.2589296229 0.7268433898 -4.5787554862  
C 1.2589296288 0.7268433796 -4.5787554862  
C 1.3030657784 -0.7523253586 -4.1249827046  
C 2.418151806 -1.3961205828 -4.9166415375  
C -2.4181518173 -1.3961205633 -4.9166415375  
C -6.1075737597 -3.5262092951 -0.4446281784  
C 6.1075737313 -3.5262093444 -0.4446281784  
C -6.396288871 -3.6928990408 -1.6189820795  
C -3.5395119896 -2.0435381547 -4.5701292481  
C -4.4285186729 -2.5568063978 -5.5947206856  
C 6.3962888412 -3.6928990923 -1.6189820795  
C 3.5395119731 -2.0435381832 -4.5701292481  
C -6.380542473 -3.6838078537 -2.9628596825  
C 6.3805424433 -3.6838079052 -2.9628596825  
C 6.0982552388 -3.5208293102 -4.135780307  
C -6.0982552672 -3.520829261 -4.135780307  
F 0.0000000125 3.0990060913 0.0123430185  
C 0.0000000284 7.0524187185 -0.4446281784  
F -2.683817985 -1.5495029954 0.0123430185  
F 2.6838179725 -1.549503017 0.0123430185  
C 5.591390867 -3.228191026 -5.4083244031  
C 4.4285186523 -2.5568064335 -5.5947206856  
C 0.0000000113 2.7922412251 -4.9166415375  
C 0.0000000165 4.0870764168 -4.5701292481  
C 0.0000000206 5.1136129102 -5.5947206856  
C 0.000000026 6.4563820858 -5.4083244031  
C 0.0000000298 7.3857982121 -1.6189820795  
C 0.0000000297 7.3676158379 -2.9628596825  
C 0.0000000284 7.0416586501 -4.135780307  
C -5.5913908931 -3.2281909809 -5.4083244031  
C 0.0000000254 6.2990256741 0.6688218185  
C 0.0000000218 5.398594444 1.4836715538  
C 5.4551162173 -3.1495128196 0.6688218185  
C -5.4551162427 -3.1495127756 0.6688218185  
C 4.6753198995 -2.6992972014 1.4836715538  
C -4.6753199213 -2.6992971637 1.4836715538  
H -2.3511640507 -0.3470814712 -2.2402070937  
H -0.000000006 -1.4999917733 -5.6697633593  
H -0.000000001 -2.4879167408 -4.2278783391

|   |               |               |               |
|---|---------------|---------------|---------------|
| H | -0.8750006135 | 2.2097085785  | -2.2402070937 |
| H | 0.8750006314  | 2.2097085715  | -2.2402070937 |
| H | 1.4761634194  | -1.8626270213 | -2.2402070937 |
| H | 2.3511640479  | -0.3470814901 | -2.2402070937 |
| H | 2.1545991278  | 1.2439584012  | -4.2278783391 |
| H | 1.299031007   | 0.7499959209  | -5.6697633593 |
| H | -1.2990310009 | 0.7499959314  | -5.6697633593 |
| H | -2.1545991178 | 1.2439584185  | -4.2278783391 |
| H | -2.2420414579 | -1.2944432009 | -5.9859494116 |
| H | 2.2420414474  | -1.294443219  | -5.9859494116 |
| H | -1.4761634344 | -1.8626270094 | -2.2402070937 |
| H | 3.8119362585  | -2.2008224191 | -3.532989037  |
| H | 6.15425563    | -3.5531611514 | -6.2753390411 |
| H | 4.1220523075  | -2.3798680052 | -6.6200026278 |
| H | 0.0000000104  | 2.5888864988  | -5.9859494116 |
| H | 0.0000000178  | 4.4016448865  | -3.532989037  |
| H | 0.0000000192  | 4.7597360561  | -6.6200026278 |
| H | 0.0000000287  | 7.1063223321  | -6.2753390411 |
| H | -3.8119362762 | -2.2008223884 | -3.532989037  |
| H | -4.1220523267 | -2.3798679719 | -6.6200026278 |
| H | -6.1542556586 | -3.5531611018 | -6.2753390411 |
| F | -0.0000000005 | -1.2469489595 | 5.8851857021  |
| F | 1.0798895015  | 0.6234745149  | 5.8851857021  |
| F | -1.0798894964 | 0.6234745236  | 5.8851857021  |

### **Crypt\_GaH\_HP**

|    |               |               |               |
|----|---------------|---------------|---------------|
| Ga | -1.7961229307 | -0.0000002472 | 0.0000000242  |
| C  | -2.8612320884 | 1.6360886714  | -0.3286587182 |
| C  | -2.861231968  | -0.5334179933 | 1.5812240067  |
| C  | -2.8612319104 | -1.1026716189 | -1.252565241  |
| C  | -4.3716230866 | -1.2654720622 | 3.7512707547  |
| C  | -2.2858378904 | -0.9272184361 | 2.7485770783  |
| C  | -4.2595491567 | -0.4816505439 | 1.4277681318  |
| C  | -4.9971292279 | -0.8655456323 | 2.5657582494  |
| C  | -2.9888396933 | -1.3148106657 | 3.8975267351  |
| F  | -6.3330162369 | -0.8942175277 | 2.6507508421  |
| F  | -5.1495796847 | -1.6131908122 | 4.7820223974  |
| C  | -4.371623372  | 3.881431186   | -0.7797047709 |
| C  | -4.2595492653 | 1.4773081393  | -0.296762799  |
| C  | -2.2858380996 | 2.8439463579  | -0.5712940287 |
| C  | -2.9888399899 | 4.0327620021  | -0.8101041861 |
| C  | -4.9971294231 | 2.6547839707  | -0.5332950073 |
| C  | -4.813004004  | -0.0000004353 | 0.0000000005  |
| F  | -6.3330164386 | 2.7427255469  | -0.5509608017 |
| F  | -5.1495800486 | 4.947947601   | -0.9939473725 |
| C  | -4.3716229497 | -2.6159603472 | -2.9715659718 |

|   |               |               |               |
|---|---------------|---------------|---------------|
| C | -4.2595491046 | -0.9956587979 | -1.1310053182 |
| C | -2.2858377901 | -1.9167287551 | -2.1772829886 |
| C | -2.9888395511 | -2.7179523012 | -3.0874225045 |
| C | -4.9971291343 | -1.7892396788 | -2.0324632448 |
| F | -6.3330161402 | -1.8485096095 | -2.0997900746 |
| F | -5.1495795102 | -3.3347581578 | -3.7880750311 |
| C | -6.3604896422 | -0.0000005318 | -0.0000000116 |
| P | 2.7157536655  | 0.0000000341  | 0.0000000595  |
| C | 3.4293072147  | 1.6210382398  | -0.3256352486 |
| C | 3.4293073911  | -1.092527456  | -1.2410425062 |
| C | 3.4293073339  | -0.528510548  | 1.56667795    |
| C | 4.9734113705  | 1.4827459528  | -0.2978549629 |
| C | 5.4337139798  | 0.4662950007  | -1.3822497921 |
| C | 4.9734114795  | -0.4834226827 | 1.4330231082  |
| C | 5.4337139294  | 0.9639163094  | 1.0949481571  |
| C | 5.433714085   | -1.4302106992 | 0.2873018773  |
| C | 4.9734115318  | -0.9993227454 | -1.1351679138 |
| C | 5.6354772053  | -1.896810207  | -2.1546572697 |
| C | 5.6354768991  | 2.8143934311  | -0.5653572542 |
| C | -0.022620329  | 6.4387638871  | -1.2934235178 |
| C | -0.0226196284 | -4.3395198057 | -4.9294213976 |
| C | 1.1765833064  | 6.673883756   | -1.340654542  |
| C | 5.0355475534  | 3.9907768216  | -0.8016700095 |
| C | 5.7332164949  | 5.2299994401  | -1.0506059276 |
| C | 1.1765840325  | -4.4979829029 | -5.109425586  |
| C | 5.0355479876  | -2.6896548035 | -3.0552788323 |
| C | 2.5218187846  | 6.7197945738  | -1.3498771128 |
| C | 2.5218195158  | -4.5289251757 | -5.1445741467 |
| C | 3.7362446278  | -4.4553581826 | -5.0610067456 |
| C | 3.7362439086  | 6.6106397068  | -1.3279499797 |
| F | -0.9273562219 | -0.9526861159 | 2.82407185    |
| C | -0.0226198554 | -2.0992444913 | 6.2228450295  |
| F | -0.9273564368 | 2.9220607058  | -0.5869856675 |
| F | -0.9273561188 | -1.969375169  | -2.2370860896 |
| C | 5.1263449214  | -4.3265460045 | -4.9146842998 |
| C | 5.733217064   | -3.5248508813 | -4.0040090959 |
| C | 5.6354771061  | -0.9175825756 | 2.720014771   |
| C | 5.0355478469  | -1.3011214818 | 3.8569490748  |
| C | 5.7332168796  | -1.7051478919 | 5.0546152729  |
| C | 5.126344695   | -2.0929682441 | 6.2042411777  |
| C | 1.1765837972  | -2.1759010386 | 6.4500802703  |
| C | 2.5218192788  | -2.190869332  | 6.4944514334  |
| C | 3.7362443947  | -2.1552812309 | 6.3889569278  |
| C | 5.1263442229  | 6.419514802   | -1.2895566428 |
| C | -1.2535096286 | -1.9254799754 | 5.7077500892  |
| C | -2.2388810952 | -1.6966153232 | 5.02932042    |

C -1.2535094204 -3.9803168835 -4.5213893904  
C -1.2535100629 5.9057962187 -1.1863606136  
C -2.2388809117 -3.5072119802 -3.9839719113  
C -2.2388814779 5.2038264789 -1.0453484466  
H 3.0749494692 2.3219551632 0.4314377169  
H 6.524902395 0.4785524126 -1.418584549  
H 5.0890186136 0.7975043005 -2.3640622561  
H 3.0749495905 0.1335974365 2.3579156051  
H 3.074949699 -1.5346134658 1.7951533438  
H 3.0749496839 -0.7873415278 -2.2265908738  
H 3.0749497571 -2.1088133935 -1.0632589841  
H 5.0890187935 -2.4460899146 0.491372419  
H 6.524902503 -1.467806133 0.2948540974  
H 6.5249023433 0.9892545353 1.1237307196  
H 5.0890185273 1.6485861604 1.8726900713  
H 6.7221666143 2.7772402322 -0.5578938707  
H 6.7221669165 -1.8717700335 -2.1262132759  
H 3.0749495043 1.9752161266 -1.2946564341  
H 3.9541581773 -2.7362802354 -3.1082423225  
H 5.747208528 -4.9141985292 -5.58222065  
H 6.8166456438 -3.5085090568 -3.9854458793  
H 6.7221668186 -0.9054693468 2.6841074192  
H 3.9541580342 -1.3236765876 3.9238095572  
H 6.8166454603 -1.697242493 5.0311813007  
H 5.7472082709 -2.3772453652 7.0469314086  
H 3.9541577356 4.0599571571 -0.8155670271  
H 6.8166450774 5.2057524194 -1.0457351466  
H 5.7472077347 7.2914445638 -1.4647105089  
F -6.8562426992 0.3988937958 -1.1824530042  
F -6.8562426092 -1.2234820691 0.245773831  
F -6.8562427424 0.824586585 0.9366791269  
H -0.2345834271 -0.0000001498 0.0000000364  
H 1.2911749709 -0.0000000547 0.0000000483

### **Crypt\_B\_As**

B -2.6053273053 -0.000000298 0.0000000179  
C -3.0240897538 1.4541087507 -0.2921024638  
C -3.0240896469 -0.4740866947 1.4053466525  
C -3.0240895955 -0.9800230283 -1.1132441448  
C -4.3169712016 -1.2446061323 3.6894173412  
C -2.3134800238 -0.845379768 2.5059805658  
C -4.4393702317 -0.4683072081 1.3882140964  
C -5.0658799844 -0.8665101773 2.5686174606  
C -2.9234338735 -1.2501038051 3.7057145052  
F -6.3896289795 -0.9196062427 2.726011262  
F -4.9832497289 -1.6136845053 4.7834858949

|    |               |               |               |
|----|---------------|---------------|---------------|
| C  | -4.3169714823 | 3.8174315978  | -0.7668484861 |
| C  | -4.4393703373 | 1.4363816558  | -0.2885414611 |
| C  | -2.3134802144 | 2.5929322782  | -0.5208701399 |
| C  | -2.9234341554 | 3.8342943131  | -0.7702358521 |
| C  | -5.0658801798 | 2.6577423862  | -0.5338892972 |
| C  | -5.0465610256 | -0.0000004502 | -0.0000000012 |
| F  | -6.3896291869 | 2.8205973345  | -0.5666037435 |
| F  | -4.9832500928 | 4.9494618875  | -0.9942515598 |
| C  | -4.3169710668 | -2.5728266797 | -2.9225688416 |
| C  | -4.439370181  | -0.9680756848 | -1.0996726248 |
| C  | -2.3134799322 | -1.7475533495 | -1.9851103652 |
| C  | -2.9234337381 | -2.5841914615 | -2.9354786067 |
| C  | -5.0658798906 | -1.7912335632 | -2.0347281676 |
| F  | -6.3896288799 | -1.9009926937 | -2.1594075539 |
| F  | -4.9832495541 | -3.335778721  | -3.7892343373 |
| C  | -6.5874063415 | -0.0000005463 | -0.0000000134 |
| As | 2.3462222217  | 0.0000000108  | 0.0000000569  |
| C  | 3.3799286924  | 1.6613801085  | -0.3337391529 |
| C  | 3.3799288732  | -1.1197165823 | -1.2719276402 |
| C  | 3.3799288145  | -0.5416633004 | 1.6056669881  |
| C  | 4.9035138652  | 1.4803071999  | -0.2973650655 |
| C  | 5.3643923719  | 0.4653179646  | -1.3793535518 |
| C  | 4.903513974   | -0.4826275769 | 1.4306661413  |
| C  | 5.3643923215  | 0.9618966027  | 1.0926539025  |
| C  | 5.3643924768  | -1.4272139702 | 0.286699891   |
| C  | 4.9035140263  | -0.9976791121 | -1.1333008449 |
| C  | 5.6248660451  | -1.8770598557 | -2.1322221118 |
| C  | 5.624865742   | 2.7850888376  | -0.5594705261 |
| C  | 0.1020109491  | 6.2304845252  | -1.2515842064 |
| C  | 0.1020116272  | -4.199146208  | -4.7699658265 |
| C  | 1.2858051029  | 6.5287700223  | -1.3115039878 |
| C  | 5.0655455068  | 3.9806622035  | -0.7996381765 |
| C  | 5.8019995023  | 5.1959021587  | -1.0437564391 |
| C  | 1.2858058134  | -4.4001809068 | -4.998328676  |
| C  | 5.06554594    | -2.6828378736 | -3.0475352303 |
| C  | 2.6243503797  | 6.6598277583  | -1.3378309329 |
| C  | 2.6243511045  | -4.4885094619 | -5.0986644441 |
| C  | 3.8419071455  | -4.4468827489 | -5.0513791927 |
| C  | 3.8419064274  | 6.598064295   | -1.3254238191 |
| F  | -0.9717193281 | -0.8238060411 | 2.4420292609  |
| C  | 0.1020114072  | -2.0313387046 | 6.0215501505  |
| F  | -0.9717195139 | 2.5267620764  | -0.5075777947 |
| F  | -0.9717192389 | -1.7029566237 | -1.9344513738 |
| C  | 5.2317684281  | -4.3162245933 | -4.9029598324 |
| C  | 5.8020000678  | -3.5018704042 | -3.9779047234 |
| C  | 5.6248659468  | -0.9080283361 | 2.6916928857  |

|   |               |               |               |
|---|---------------|---------------|---------------|
| C | 5.0655457995  | -1.2978237887 | 3.8471736415  |
| C | 5.8019998843  | -1.6940310755 | 5.0216614146  |
| C | 5.2317682019  | -2.0879752547 | 6.1894403469  |
| C | 1.2858055829  | -2.1285892815 | 6.3098328094  |
| C | 2.6243508694  | -2.1713182119 | 6.4364955541  |
| C | 3.8419069125  | -2.1511812338 | 6.3768032176  |
| C | 5.2317677311  | 6.4042004202  | -1.2864802759 |
| C | -1.1022638676 | -1.83925409   | 5.4521484672  |
| C | -2.0962617456 | -1.6149097543 | 4.7871184889  |
| C | -1.1022636684 | -3.8020723134 | -4.318914778  |
| C | -1.1022642824 | 5.6413257907  | -1.1332335999 |
| C | -2.0962615707 | -3.3383117255 | -3.792111853  |
| C | -2.0962621098 | 4.953220681   | -0.9950065701 |
| H | 3.0576736892  | 2.3862169878  | 0.4151653744  |
| H | 6.4576095774  | 0.4794315118  | -1.4211904988 |
| H | 5.0129700939  | 0.7959196894  | -2.3593649663 |
| H | 3.0576738155  | 0.1093097664  | 2.4195960768  |
| H | 3.0576739235  | -1.5526521181 | 1.858941889   |
| H | 3.0576739112  | -0.8335647042 | -2.2741070761 |
| H | 3.0576739842  | -2.1500864158 | -1.115132958  |
| H | 5.0129702734  | -2.441229644  | 0.4903960829  |
| H | 6.4576096855  | -1.4705025079 | 0.2953957459  |
| H | 6.4576095254  | 0.9910717977  | 1.1257950203  |
| H | 5.0129700077  | 1.645310486   | 1.8689691169  |
| H | 6.7112078704  | 2.715582995   | -0.5455081202 |
| H | 6.7112081659  | -1.830215042  | -2.0790094178 |
| H | 3.0576737243  | 2.0407768149  | -1.3044629315 |
| H | 3.9875283905  | -2.744555344  | -3.1176423274 |
| H | 5.8652257065  | -4.8971590274 | -5.5628648551 |
| H | 6.8847761041  | -3.4646584953 | -3.9356344033 |
| H | 6.7112080701  | -0.8853671039 | 2.6245178115  |
| H | 3.9875282467  | -1.3276796741 | 3.9356760163  |
| H | 6.8847759226  | -1.6760297649 | 4.9682998673  |
| H | 5.8652254499  | -2.3690024964 | 7.0224968779  |
| H | 3.9875279473  | 4.0722353576  | -0.8180334796 |
| H | 6.8847755446  | 5.1406891418  | -1.0326651864 |
| H | 5.8652249157  | 7.2661622147  | -1.4596317692 |
| F | -7.0723572416 | 0.399455491   | -1.1841180944 |
| F | -7.0723571515 | -1.2252049464 | 0.2461199192  |
| F | -7.0723572849 | 0.8257477256  | 0.9379981237  |

### Crypt\_BH\_HAs

|   |           |           |           |
|---|-----------|-----------|-----------|
| 5 | -1.9962   | 0.000195  | -0.000186 |
| 6 | -2.675851 | -0.385101 | 1.403243  |
| 6 | -2.677153 | -1.022239 | -1.035277 |
| 6 | -2.675963 | 1.408379  | -0.367699 |

|    |           |           |           |
|----|-----------|-----------|-----------|
| 6  | -4.025044 | -2.724669 | -2.757447 |
| 6  | -2.006912 | -1.86016  | -1.882686 |
| 6  | -4.086725 | -1.018902 | -1.031978 |
| 6  | -4.744295 | -1.885457 | -1.908837 |
| 6  | -2.633468 | -2.744949 | -2.777491 |
| 9  | -6.073829 | -1.992065 | -2.016925 |
| 9  | -4.70487  | -3.534192 | -3.576114 |
| 6  | -4.021965 | -1.026342 | 3.739434  |
| 6  | -4.085386 | -0.383807 | 1.399859  |
| 6  | -2.004747 | -0.700726 | 2.551885  |
| 6  | -2.630362 | -1.03411  | 3.765799  |
| 6  | -4.742052 | -0.710023 | 2.589144  |
| 6  | -4.693361 | 0.000982  | 0.000966  |
| 9  | -6.071505 | -0.749057 | 2.73657   |
| 9  | -4.700956 | -1.330829 | 4.850274  |
| 6  | -4.022219 | 3.752248  | -0.980287 |
| 6  | -4.085479 | 1.405049  | -0.366062 |
| 6  | -2.00495  | 2.560814  | -0.669403 |
| 6  | -2.630622 | 3.778764  | -0.98754  |
| 6  | -4.742244 | 2.598154  | -0.678235 |
| 9  | -6.071699 | 2.745537  | -0.717528 |
| 9  | -4.701155 | 4.866502  | -1.272111 |
| 6  | -6.234571 | 0.002111  | 0.001937  |
| 33 | 2.356849  | 0.000491  | 0.000692  |
| 6  | 3.204201  | -0.463696 | 1.684491  |
| 6  | 3.203705  | 1.690877  | -0.44056  |
| 6  | 3.201864  | -1.226864 | -1.243741 |
| 6  | 4.733694  | -0.404546 | 1.466107  |
| 6  | 5.1733    | 1.024238  | 1.037836  |
| 6  | 4.73166   | -1.069044 | -1.08437  |
| 6  | 5.171779  | -1.413117 | 0.366536  |
| 6  | 5.171139  | 0.386935  | -1.408574 |
| 6  | 4.73332   | 1.471982  | -0.384589 |
| 6  | 5.489     | 2.740017  | -0.715266 |
| 6  | 5.489712  | -0.751866 | 2.729469  |
| 6  | 0.272625  | -1.722554 | 6.267363  |
| 6  | 0.272535  | 6.288824  | -1.643603 |
| 6  | 1.444241  | -1.814627 | 6.601572  |
| 6  | 5.002843  | -1.083354 | 3.933094  |
| 6  | 5.835165  | -1.395364 | 5.073097  |
| 6  | 1.444099  | 6.624421  | -1.731116 |
| 6  | 5.002166  | 3.947898  | -1.030853 |
| 6  | 2.784909  | -1.843387 | 6.706038  |
| 6  | 2.784726  | 6.729588  | -1.758461 |
| 6  | 3.997922  | 6.621116  | -1.730125 |
| 6  | 3.998088  | -1.813547 | 6.597757  |

|   |           |           |           |
|---|-----------|-----------|-----------|
| 9 | -0.648247 | -1.857898 | -1.880133 |
| 6 | 0.267701  | -4.570856 | -4.623603 |
| 9 | -0.646039 | -0.699352 | 2.547655  |
| 9 | -0.646207 | 2.556386  | -0.669298 |
| 6 | 5.366431  | 6.322786  | -1.652085 |
| 6 | 5.834654  | 5.091208  | -1.330114 |
| 6 | 5.48623   | -1.989304 | -2.018059 |
| 6 | 4.998456  | -2.86731  | -2.905102 |
| 6 | 5.830363  | -3.697264 | -3.746992 |
| 6 | 5.361661  | -4.592356 | -4.651827 |
| 6 | 1.439229  | -4.814469 | -4.870675 |
| 6 | 2.779896  | -4.890003 | -4.948504 |
| 6 | 3.993075  | -4.810155 | -4.869545 |
| 6 | 5.366669  | -1.731682 | 6.30074   |
| 6 | -0.908766 | -4.112947 | -4.160322 |
| 6 | -1.838414 | -3.561756 | -3.603068 |
| 6 | -0.904279 | 5.659207  | -1.47923  |
| 6 | -0.904209 | -1.549781 | 5.640014  |
| 6 | -1.834614 | 4.901674  | -1.281264 |
| 6 | -1.834434 | -1.341928 | 4.884994  |
| 1 | 2.867513  | -1.458151 | 1.973874  |
| 1 | 6.263897  | 1.058427  | 1.072814  |
| 1 | 4.822286  | 1.750377  | 1.774143  |
| 1 | 2.865233  | -2.236082 | -1.010607 |
| 1 | 2.864579  | -0.980401 | -2.249495 |
| 1 | 2.868209  | 2.439081  | 0.276152  |
| 1 | 2.866428  | 1.993914  | -1.43081  |
| 1 | 4.818804  | 0.661558  | -2.405086 |
| 1 | 6.261668  | 0.399641  | -1.457237 |
| 1 | 6.262408  | -1.461527 | 0.378123  |
| 1 | 4.820082  | -2.413553 | 0.627267  |
| 1 | 6.569806  | -0.716929 | 2.607408  |
| 1 | 6.569116  | 2.61716   | -0.683619 |
| 1 | 2.868366  | 0.242452  | 2.442602  |
| 1 | 3.932577  | 4.115852  | -1.074874 |
| 1 | 6.073881  | 7.117268  | -1.859701 |
| 1 | 6.908557  | 4.949106  | -1.293285 |
| 1 | 6.566458  | -1.899304 | -1.929824 |
| 1 | 3.928767  | -2.990374 | -3.026571 |
| 1 | 6.904323  | -3.592869 | -3.644332 |
| 1 | 6.068814  | -5.168777 | -5.237045 |
| 1 | 3.933272  | -1.1304   | 4.100155  |
| 1 | 6.909098  | -1.355999 | 4.931902  |
| 1 | 6.073928  | -1.948294 | 7.092989  |
| 9 | -6.726774 | 0.880375  | 0.890658  |
| 9 | -6.728329 | 0.333137  | -1.202309 |



9 -6.729224 -1.205646 0.318399  
1 -0.786122 0 -0.000798  
1 0.828665 0.00053 0.001001

### **Crypt\_Al\_As**

Al -1.1583973639 -0.0000002078 0.0000000293  
C -2.1499196101 1.6569800919 -0.3328553871  
C -2.1499194883 -0.5402292107 1.6014148125  
C -2.1499194298 -1.11675169 -1.2685593608  
C -3.7333427552 -1.2614497348 3.7393473855  
C -1.6212079578 -0.9417717227 2.7917178934  
C -3.5578758318 -0.4802942511 1.4237477716  
C -4.3240635921 -0.8572492816 2.5411652879  
C -2.3604806087 -1.3226560052 3.9207829996  
F -5.6585002309 -0.8795030793 2.6071325458  
F -4.5382938496 -1.6014571061 4.7472399813  
C -3.7333430397 3.8690941365 -0.7772264822  
C -3.5578759401 1.4731483192 -0.2959271569  
C -1.6212081702 2.8885841 -0.5802608767  
C -2.360480907 4.0568252417 -0.8149380139  
C -4.3240637855 2.6293377237 -0.528183333  
C -4.1047007179 -0.0000003915 0.0000000062  
F -5.6585004293 2.697593828 -0.5418946956  
F -4.5382942107 4.9119583445 -0.986717812  
C -3.7333426186 -2.6076455067 -2.9621208761  
C -3.5578757798 -0.9928551403 -1.1278205833  
C -1.6212078558 -1.9468130872 -2.2114569396  
C -2.3604804655 -2.7341700847 -3.1058449261  
C -4.3240634993 -1.7720896577 -2.0129819416  
F -5.6585001357 -1.8180922139 -2.0652378684  
F -4.5382936761 -3.310502494 -3.760522161  
C -5.6590401297 -0.0000004884 -0.0000000061  
As 1.5551826043 -0.0000000385 0.0000000506  
C 2.5094012947 1.7045636033 -0.3424139022  
C 2.5094014802 -1.1488209584 -1.3049883263  
C 2.50940142 -0.5557425819 1.6474024029  
C 4.0335491628 1.486038678 -0.2985164267  
C 4.4734522819 0.4656529586 -1.3803467552  
C 4.033549272 -0.4844962952 1.4362054642  
C 4.4734522314 0.9625891556 1.0934406552  
C 4.4734523869 -1.4282416838 0.2869063207  
C 4.0335493245 -1.0015420346 -1.1376888271  
C 4.8481108418 -1.8444547372 -2.0951846987  
C 4.848110544 2.7367108598 -0.5497523389  
C 0.2691747892 6.8453804289 -1.3751049351  
C 0.2691755343 -4.6135662342 -5.2407209245

|   |               |               |               |
|---|---------------|---------------|---------------|
| C | 1.4463493954  | 7.1630809713  | -1.4389248249 |
| C | 4.4918392123  | 4.0034518698  | -0.8042161928 |
| C | 5.4927821219  | 5.0305418909  | -1.0105387557 |
| C | 1.446350175   | -4.8276860492 | -5.4839476426 |
| C | 4.491839648   | -2.6981974349 | -3.0649826898 |
| C | 2.7905666193  | 7.1612897594  | -1.4385649775 |
| C | 2.7905673987  | -4.8264786897 | -5.4825762429 |
| C | 3.972212425   | -4.6325741225 | -5.2623129234 |
| C | 3.9722116769  | 6.8735839642  | -1.3807704061 |
| F | -0.2631910292 | -0.9812683452 | 2.9087990271  |
| C | 0.2691752925  | -2.2318145508 | 6.6158259811  |
| F | -0.2631912505 | 3.0097277652  | -0.6045962757 |
| F | -0.2631909229 | -2.0284598758 | -2.3042026423 |
| C | 5.2638844923  | -4.2734716562 | -4.8543951865 |
| C | 5.4927826694  | -3.3904229395 | -3.8513073928 |
| C | 4.8481107452  | -0.8922556221 | 2.6449372672  |
| C | 4.4918395067  | -1.305254001  | 3.8691991038  |
| C | 5.4927824918  | -1.6401183303 | 4.8618463932  |
| C | 5.2638842684  | -2.0672935034 | 6.1281328965  |
| C | 1.4463499221  | -2.335395058  | 6.9228726169  |
| C | 2.7905671458  | -2.3348109541 | 6.9211414015  |
| C | 3.9722121823  | -2.241009505  | 6.6430835383  |
| C | 5.2638838022  | 6.3407657379  | -1.2737374706 |
| C | -0.862982386  | -1.9998827458 | 5.9283042425  |
| C | -1.7073516851 | -1.7207160062 | 5.1007628061  |
| C | -0.8629821694 | -4.134120959  | -4.6961011723 |
| C | -0.862982837  | 6.1340031369  | -1.2322029753 |
| C | -1.7073514987 | -3.557032507  | -4.0405649301 |
| C | -1.7073520731 | 5.2777477872  | -1.060197801  |
| H | 2.1791184366  | 2.4199178773  | 0.4094263108  |
| H | 5.5642345945  | 0.4830417767  | -1.4318926737 |
| H | 4.1170748051  | 0.7956465432  | -2.3585554445 |
| H | 2.1791185653  | 0.0993446153  | 2.4522975572  |
| H | 2.1791186735  | -1.564532476  | 1.8909972844  |
| H | 2.1791186622  | -0.8553854001 | -2.3004234285 |
| H | 2.1791187353  | -2.1734242411 | -1.1401137351 |
| H | 4.1170749845  | -2.4403920822 | 0.4902278146  |
| H | 5.5642347034  | -1.4815760731 | 0.2976201935  |
| H | 5.5642345422  | 0.9985349309  | 1.1342727266  |
| H | 4.1170747189  | 1.6447459027  | 1.8683278422  |
| H | 5.916842231   | 2.5347787395  | -0.5091880473 |
| H | 5.9168425069  | -1.7083588773 | -1.9405884281 |
| H | 2.1791184717  | 2.074079627   | -1.3121836555 |
| H | 3.4502462346  | -2.8959567907 | -3.2896248156 |
| H | 6.1086310695  | -4.7218537735 | -5.3637291268 |
| H | 6.5272981163  | -3.1753852627 | -3.6070381806 |

H 5.9168424174 -0.8264191617 2.4497767302  
H 3.4502460829 -1.4009202011 4.1527847241  
H 6.52729795 -1.5360937358 4.5534837643  
H 6.1086308221 -2.2841985027 6.7711102264  
H 3.450245767 4.2968772308 -0.8631597119  
H 6.5272976036 4.7114798132 -0.9464453146  
H 6.108630307 7.0060530126 -1.4073808404  
F -6.1528836492 0.3986720419 -1.1817955184  
F -6.1528835593 -1.2228017322 0.2456371786  
F -6.1528836924 0.8241281326 0.93615831

### Crypt\_AIH\_HAs

13 1.718656 0.001787 0.000435  
6 2.702069 1.607859 -0.454816  
6 2.69904 -1.196427 -1.164633  
6 2.700963 -0.408949 1.619231  
6 4.195967 -2.842164 -2.764123  
6 2.119624 -2.077976 -2.020711  
6 4.101381 -1.082682 -1.054291  
6 4.830489 -1.945507 -1.893127  
6 2.812611 -2.951158 -2.869184  
9 6.165041 -2.013767 -1.959879  
9 4.970616 -3.622633 -3.523008  
6 4.202556 3.813687 -1.07984  
6 4.104038 1.453189 -0.411653  
6 2.124578 2.791181 -0.789368  
6 2.819391 3.961471 -1.121225  
6 4.835143 2.609859 -0.739182  
6 4.657525 -0.000725 -0.001098  
9 6.169885 2.699302 -0.764892  
9 4.978804 4.859889 -1.376578  
6 4.200811 -0.976188 3.840948  
6 4.103056 -0.371491 1.463248  
6 2.123105 -0.710362 2.811283  
6 2.817651 -1.010779 3.990199  
6 4.833691 -0.669544 2.628219  
9 6.168364 -0.696378 2.718202  
9 4.976814 -1.245843 4.894622  
6 6.204327 -0.002191 -0.001798  
33 -2.671041 0.001465 -0.002121  
6 -3.566537 1.65989 -0.477035  
6 -3.564443 -0.414987 1.672491  
6 -3.566476 -1.240787 -1.198904  
6 -5.093914 1.461504 -0.419996  
6 -5.542974 1.050864 1.012943  
6 -5.093822 -1.092443 -1.054426

|   |           |           |           |
|---|-----------|-----------|-----------|
| 6 | -5.54393  | 0.353491  | -1.416232 |
| 6 | -5.542066 | -1.402244 | 0.403549  |
| 6 | -5.092289 | -0.365971 | 1.474209  |
| 6 | -5.796418 | -0.690004 | 2.776041  |
| 6 | -5.799049 | 2.751063  | -0.789223 |
| 6 | -0.169006 | 6.299092  | -1.786324 |
| 6 | -0.170372 | -1.600461 | 6.348391  |
| 6 | -1.368926 | 6.525525  | -1.852278 |
| 6 | -5.220972 | 3.916018  | -1.118946 |
| 6 | -5.927093 | 5.126484  | -1.464053 |
| 6 | -1.37017  | -1.655368 | 6.578254  |
| 6 | -5.21881  | -0.98492  | 3.950472  |
| 6 | -2.714553 | 6.579066  | -1.869817 |
| 6 | -2.71575  | -1.665758 | 6.633507  |
| 6 | -3.930814 | -1.637372 | 6.533633  |
| 6 | -3.929662 | 6.478766  | -1.843783 |
| 9 | 0.75813   | -2.122293 | -2.062796 |
| 6 | -0.176788 | -4.697947 | -4.55836  |
| 9 | 0.763198  | 2.852391  | -0.805725 |
| 9 | 0.761725  | -0.724057 | 2.872614  |
| 6 | -5.322686 | -1.587581 | 6.348966  |
| 6 | -5.926426 | -1.290146 | 5.170742  |
| 6 | -5.799726 | -2.05773  | -1.984904 |
| 6 | -5.223321 | -2.928701 | -2.826954 |
| 6 | -5.931933 | -3.832929 | -3.70059  |
| 6 | -5.328962 | -4.704786 | -4.54762  |
| 6 | -1.376563 | -4.869477 | -4.721144 |
| 6 | -2.722125 | -4.912464 | -4.75825  |
| 6 | -3.937205 | -4.840407 | -4.683752 |
| 6 | -5.321738 | 6.295117  | -1.79438  |
| 6 | 1.056472  | -4.308429 | -4.183498 |
| 6 | 2.054092  | -3.805902 | -3.697881 |
| 6 | 1.062957  | -1.471002 | 5.823722  |
| 6 | 1.064468  | 5.779737  | -1.637737 |
| 6 | 2.06043   | -1.301815 | 5.14546   |
| 6 | 2.062058  | 5.107532  | -1.44639  |
| 1 | -3.235222 | 1.946054  | -1.474434 |
| 1 | -6.634561 | 1.082793  | 1.044888  |
| 1 | -5.193705 | 1.795661  | 1.731339  |
| 1 | -3.235285 | -1.025679 | -2.214099 |
| 1 | -3.23533  | -2.247072 | -0.945384 |
| 1 | -3.232433 | 0.307425  | 2.417073  |
| 1 | -3.232655 | -1.401905 | 1.992827  |
| 1 | -5.190999 | -2.396309 | 0.689005  |
| 1 | -6.63354  | -1.44708  | 0.4176    |
| 1 | -6.635679 | 0.364225  | -1.459274 |

|   |           |           |           |
|---|-----------|-----------|-----------|
| 1 | -5.195535 | 0.602953  | -2.420753 |
| 1 | -6.884919 | 2.691835  | -0.774391 |
| 1 | -6.882329 | -0.674397 | 2.717035  |
| 1 | -3.235192 | 2.429451  | 0.219055  |
| 1 | -4.139242 | -1.006965 | 4.031763  |
| 1 | -5.941953 | -1.803066 | 7.212647  |
| 1 | -7.009845 | -1.281409 | 5.143543  |
| 1 | -6.885558 | -2.013904 | -1.940867 |
| 1 | -4.143829 | -2.989063 | -2.88702  |
| 1 | -7.015332 | -3.813642 | -3.678428 |
| 1 | -5.948771 | -5.345131 | -5.165387 |
| 1 | -4.141352 | 3.996889  | -1.138886 |
| 1 | -7.010555 | 5.099774  | -1.45888  |
| 1 | -5.939968 | 7.151707  | -2.039141 |
| 9 | 6.699515  | 0.890993  | 0.86929   |
| 9 | 6.696829  | -1.204363 | 0.336312  |
| 9 | 6.698168  | 0.305088  | -1.211539 |
| 1 | 0.083298  | 0.003958  | 0.000176  |
| 1 | -0.969312 | 0.002647  | -0.003166 |

### **Crypt\_Ga\_As**

|    |               |               |               |
|----|---------------|---------------|---------------|
| Ga | -1.1098006598 | -0.0000002047 | 0.0000000297  |
| C  | -2.1373140544 | 1.6676115495  | -0.3349910417 |
| C  | -2.1373139317 | -0.5436954071 | 1.6116897516  |
| C  | -2.1373138729 | -1.1239169489 | -1.276698645  |
| C  | -3.7223618417 | -1.2619748651 | 3.7409040453  |
| C  | -1.604618558  | -0.9445653938 | 2.7999992492  |
| C  | -3.5401903099 | -0.4806209654 | 1.4247162627  |
| C  | -4.3095008284 | -0.8576009659 | 2.5422077978  |
| C  | -2.3497142297 | -1.3242307945 | 3.9254511908  |
| F  | -5.6439108482 | -0.8788241378 | 2.6051199445  |
| F  | -4.5295852209 | -1.6015611638 | 4.7475484438  |
| C  | -3.7223621263 | 3.8707048095  | -0.7775500352 |
| C  | -3.5401904183 | 1.4741504157  | -0.2961284584 |
| C  | -1.604618771  | 2.8971528016  | -0.5819821633 |
| C  | -2.3497145283 | 4.0616554094  | -0.8159083012 |
| C  | -4.3095010218 | 2.6304164072  | -0.5284000194 |
| C  | -4.0830922054 | -0.0000003902 | 0.0000000063  |
| F  | -5.6439110464 | 2.6955113946  | -0.5414763746 |
| F  | -4.529585582  | 4.9122775105  | -0.9867819261 |
| C  | -3.722361705  | -2.6087310473 | -2.9633539827 |
| C  | -3.5401902579 | -0.9935305192 | -1.1285877725 |
| C  | -1.6046184557 | -1.9525881145 | -2.2180170085 |
| C  | -2.3497140863 | -2.7374254611 | -3.1095428297 |
| C  | -4.3095007355 | -1.7728166541 | -2.0138077647 |
| F  | -5.6439107531 | -1.8166887193 | -2.0636435877 |

|    |               |               |               |
|----|---------------|---------------|---------------|
| F  | -4.5295850474 | -3.3107176007 | -3.7607665092 |
| C  | -5.6380014252 | -0.0000004871 | -0.0000000059 |
| As | 1.5425701482  | -0.0000000393 | 0.0000000505  |
| C  | 2.4923426435  | 1.7052735397  | -0.3425565151 |
| C  | 2.4923428291  | -1.1492994345 | -1.305531844  |
| C  | 2.4923427689  | -0.5559740455 | 1.6480885331  |
| C  | 4.0169266722  | 1.4860113306  | -0.2985109335 |
| C  | 4.4563882424  | 0.4656835555  | -1.3804374576 |
| C  | 4.0169267814  | -0.4844873805 | 1.4361790347  |
| C  | 4.456388192   | 0.9626524061  | 1.0935125048  |
| C  | 4.4563883474  | -1.4283355343 | 0.2869251731  |
| C  | 4.0169268339  | -1.0015236051 | -1.1376678913 |
| C  | 4.8330129494  | -1.8437632749 | -2.0943992401 |
| C  | 4.8330126516  | 2.7356849     | -0.5495462437 |
| C  | 0.2716454528  | 6.8570804515  | -1.377455244  |
| C  | 0.2716461991  | -4.6214516726 | -5.2496782866 |
| C  | 1.4489632527  | 7.1742596184  | -1.4411703995 |
| C  | 4.4803889493  | 4.0034181784  | -0.8042094251 |
| C  | 5.4854152784  | 5.0268242845  | -1.0097919604 |
| C  | 1.4489640335  | -4.8352200972 | -5.4925058475 |
| C  | 4.480389385   | -2.6981747292 | -3.0649568969 |
| C  | 2.7931765188  | 7.1696193913  | -1.4402382399 |
| C  | 2.7931772991  | -4.8320925932 | -5.4889532843 |
| C  | 3.9735065983  | -4.6347244404 | -5.2647555493 |
| C  | 3.9735058499  | 6.8767744994  | -1.381411323  |
| F  | -0.2496191599 | -0.9850614694 | 2.9200430871  |
| C  | 0.2716459569  | -2.2356291346 | 6.6271336523  |
| F  | -0.2496193821 | 3.0213619701  | -0.6069333629 |
| F  | -0.2496190532 | -2.0363009539 | -2.3131096148 |
| C  | 5.2625945838  | -4.271640854  | -4.8523155104 |
| C  | 5.4854158255  | -3.3879173932 | -3.8484612493 |
| C  | 4.8330128528  | -0.8919211274 | 2.643945713   |
| C  | 4.4803892436  | -1.3052430175 | 3.8691665428  |
| C  | 5.485415648   | -1.6389062715 | 4.8582534543  |
| C  | 5.26259436    | -2.0664078522 | 6.1255075371  |
| C  | 1.4489637802  | -2.3390396566 | 6.9336763965  |
| C  | 2.7931770459  | -2.3375266821 | 6.9291917054  |
| C  | 3.9735063555  | -2.2420497221 | 6.6461670813  |
| C  | 5.262593894   | 6.3380492843  | -1.2731917875 |
| C  | -0.8589701886 | -2.0029537012 | 5.9374075566  |
| C  | -1.7008011124 | -1.7230116683 | 5.1075678986  |
| C  | -0.8589699717 | -4.1404691823 | -4.7033123549 |
| C  | -0.8589706403 | 6.1434223162  | -1.2340951067 |
| C  | -1.7008009257 | -3.5617780583 | -4.0459555783 |
| C  | -1.7008015009 | 5.2847890018  | -1.0616122452 |
| H  | 2.1617915065  | 2.4199124265  | 0.409669501   |

|   |               |               |               |
|---|---------------|---------------|---------------|
| H | 5.5471030885  | 0.4832135436  | -1.43240185   |
| H | 4.0996618644  | 0.7956309614  | -2.3585092583 |
| H | 2.1617916352  | 0.0995865333  | 2.4523229811  |
| H | 2.1617917434  | -1.5647403613 | 1.8908709695  |
| H | 2.1617917321  | -0.8551720673 | -2.3005403042 |
| H | 2.1617918052  | -2.1735672196 | -1.1399169391 |
| H | 4.0996620439  | -2.4403442944 | 0.4902182146  |
| H | 5.5471031975  | -1.4821029177 | 0.2977260261  |
| H | 5.5471030362  | 0.9988900054  | 1.13467607    |
| H | 4.0996617783  | 1.6447136935  | 1.8682912556  |
| H | 5.9012866916  | 2.53148758    | -0.5085269172 |
| H | 5.9012869671  | -1.7061407434 | -1.9380687665 |
| H | 2.1617915416  | 2.0739806843  | -1.3124058758 |
| H | 3.4397706982  | -2.8981933016 | -3.2921653506 |
| H | 6.1105288181  | -4.7173939502 | -5.3586630481 |
| H | 6.5185527682  | -3.1700027017 | -3.6009239293 |
| H | 5.9012868777  | -0.825346139  | 2.446595938   |
| H | 3.4397705464  | -1.4020021145 | 4.1559918662  |
| H | 6.5185526022  | -1.5334899201 | 4.5457652035  |
| H | 6.110528571   | -2.2820410614 | 6.7647148669  |
| H | 3.4397702302  | 4.3001956531  | -0.8638263192 |
| H | 6.5185522563  | 4.7034934348  | -0.9448410053 |
| H | 6.1105280564  | 6.9994357483  | -1.4060515595 |
| F | -6.1318402409 | 0.3986168056  | -1.1816317759 |
| F | -6.1318401511 | -1.222632307  | 0.2456031448  |
| F | -6.1318402841 | 0.8240139477  | 0.9360286018  |

### Crypt\_GaH\_HAs

|    |          |           |           |
|----|----------|-----------|-----------|
| 31 | 1.62166  | 0.000688  | 0.00022   |
| 6  | 2.654234 | -1.212055 | -1.155702 |
| 6  | 2.655241 | -0.395875 | 1.627261  |
| 6  | 2.656451 | 1.606716  | -0.47152  |
| 6  | 4.155244 | -0.937688 | 3.851563  |
| 6  | 2.073347 | -0.684733 | 2.820674  |
| 6  | 4.052901 | -0.358312 | 1.467035  |
| 6  | 4.785755 | -0.643595 | 2.636212  |
| 6  | 2.771612 | -0.971943 | 4.000735  |
| 9  | 6.120925 | -0.667814 | 2.724829  |
| 9  | 4.931414 | -1.195664 | 4.909058  |
| 6  | 4.152379 | -2.869882 | -2.736312 |
| 6  | 4.052087 | -1.094005 | -1.042749 |
| 6  | 2.071369 | -2.100148 | -2.002931 |
| 6  | 2.76862  | -2.979615 | -2.841321 |
| 6  | 4.78394  | -1.96548  | -1.873623 |
| 6  | 4.605408 | -0.00191  | -0.000424 |

|    |           |           |           |
|----|-----------|-----------|-----------|
| 9  | 6.119013  | -2.032889 | -1.937457 |
| 9  | 4.927686  | -3.658252 | -3.487757 |
| 6  | 4.15872   | 3.801804  | -1.116746 |
| 6  | 4.053914  | 1.447474  | -0.425236 |
| 6  | 2.075751  | 2.785597  | -0.816994 |
| 6  | 2.775239  | 3.950097  | -1.1595   |
| 6  | 4.787984  | 2.601445  | -0.764294 |
| 9  | 6.123276  | 2.688335  | -0.789895 |
| 9  | 4.935856  | 4.845415  | -1.423688 |
| 6  | 6.152345  | -0.003076 | -0.000322 |
| 33 | -2.766152 | -0.00261  | -0.000703 |
| 6  | -3.632228 | -1.256772 | -1.192853 |
| 6  | -3.626711 | 1.659292  | -0.491397 |
| 6  | -3.630475 | -0.406494 | 1.682882  |
| 6  | -5.16052  | -1.100778 | -1.048296 |
| 6  | -5.605298 | 0.344807  | -1.420266 |
| 6  | -5.159213 | -0.354406 | 1.478994  |
| 6  | -5.608859 | -1.397694 | 0.413475  |
| 6  | -5.604006 | 1.061067  | 1.005676  |
| 6  | -5.155866 | 1.461131  | -0.431474 |
| 6  | -5.857187 | 2.749518  | -0.81087  |
| 6  | -5.864949 | -2.072877 | -1.972923 |
| 6  | -0.222234 | -4.736199 | -4.51431  |
| 6  | -0.212446 | 6.280414  | -1.845167 |
| 6  | -1.422367 | -4.907172 | -4.676232 |
| 6  | -5.285373 | -2.949373 | -2.807181 |
| 6  | -5.987492 | -3.863001 | -3.676208 |
| 6  | -1.412415 | 6.507045  | -1.912228 |
| 6  | -5.275927 | 3.909811  | -1.151297 |
| 6  | -2.76809  | -4.94664  | -4.712327 |
| 6  | -2.758147 | 6.558799  | -1.92791  |
| 6  | -3.97353  | 6.461046  | -1.899557 |
| 6  | -3.983422 | -4.873356 | -4.640818 |
| 9  | 0.714344  | -0.699221 | 2.887445  |
| 6  | -0.218128 | -1.539911 | 6.360243  |
| 9  | 0.712276  | -2.14864  | -2.049518 |
| 9  | 0.716862  | 2.85262   | -0.83547  |
| 6  | -5.36603  | 6.282424  | -1.847676 |
| 6  | -5.977401 | 5.119905  | -1.506951 |
| 6  | -5.862278 | -0.668258 | 2.783973  |
| 6  | -5.281835 | -0.952348 | 3.959776  |
| 6  | -5.983471 | -1.248781 | 5.185612  |
| 6  | -5.371912 | -1.534932 | 6.362685  |
| 6  | -1.418253 | -1.593995 | 6.589537  |
| 6  | -2.764003 | -1.60526  | 6.641992  |
| 6  | -3.979358 | -1.580128 | 6.542916  |



|   |           |           |           |
|---|-----------|-----------|-----------|
| 6 | -5.376009 | -4.739932 | -4.511944 |
| 6 | 1.017351  | -1.415445 | 5.839676  |
| 6 | 2.013798  | -1.251654 | 5.158301  |
| 6 | 1.022744  | 5.766417  | -1.69361  |
| 6 | 1.013314  | -4.348576 | -4.14553  |
| 6 | 2.018645  | 5.093403  | -1.495515 |
| 6 | 2.009979  | -3.841354 | -3.662455 |
| 1 | -3.300235 | -2.259977 | -0.92934  |
| 1 | -6.696602 | 0.357716  | -1.464653 |
| 1 | -5.255387 | 0.58655   | -2.426152 |
| 1 | -3.297993 | -1.391826 | 2.006343  |
| 1 | -3.294714 | 0.321804  | 2.419696  |
| 1 | -3.292291 | 1.932551  | -1.491227 |
| 1 | -3.290566 | 2.431247  | 0.199354  |
| 1 | -5.252898 | 1.8105    | 1.718307  |
| 1 | -6.695183 | 1.096462  | 1.037327  |
| 1 | -6.700233 | -1.439146 | 0.426473  |
| 1 | -5.261516 | -2.390726 | 0.706628  |
| 1 | -6.950639 | -2.02909  | -1.930272 |
| 1 | -6.942978 | 2.692269  | -0.79503  |
| 1 | -3.297379 | -1.046338 | -2.207551 |
| 1 | -4.196006 | 3.988125  | -1.173849 |
| 1 | -5.98113  | 7.139359  | -2.099464 |
| 1 | -7.060888 | 5.098021  | -1.501298 |
| 1 | -6.94802  | -0.653895 | 2.725411  |
| 1 | -4.201979 | -0.971522 | 4.039484  |
| 1 | -7.066957 | -1.24267  | 5.163963  |
| 1 | -5.98684  | -1.745122 | 7.230877  |
| 1 | -4.205575 | -3.009171 | -2.864173 |
| 1 | -7.070965 | -3.847241 | -3.65995  |
| 1 | -5.990888 | -5.387118 | -5.127703 |
| 9 | 6.647357  | 0.29185   | -1.212809 |
| 9 | 6.647515  | 0.89893   | 0.861999  |
| 9 | 6.64553   | -1.201402 | 0.350299  |
| 1 | 0.038507  | 0.000722  | 0.000655  |
| 1 | -1.165224 | -0.003455 | -0.00009  |
